# Supplementary material for: Puromycin reactivity does not accurately localize translation at the subcellular level
Source: eLife. 2020 Aug 26;9:e60303. doi: 10.7554/eLife.60303 (PMC7490009; doi:10.7554/eLife.60303)
Supplement: Figure 2—source data 1. [file elife-60303-fig2-data1.xlsx]

## Sheet: Replicate 1
Figure 2-source data 1		Note: "Normalized IntDen" values used for Figure 2B plot
Figure 2B		OPP	Area	Mean	StdDev	IntDen	RawIntDen	Normalized IntDen			EMETINE	Area	Mean	StdDev	IntDen	RawIntDen	Normalized IntDen			ANISOMYCIN	Area	Mean	StdDev	IntDen	RawIntDen	Normalized IntDen
Replicate 1	1	AVG_OPP_1	1515.81	14512.1	2964.04	2.19977e+07	569572855	1.03566		1	AVG_emetine_1	1125.23	20331.9	5357.9	2.28781e+07	592368994	0.786954		1	AVG_anisomycin_1	910.536	8310.8	2276.28	7.56729e+06	195935502	0.356271
	2	AVG_OPP_2	1484.53	13138.8	2731.76	1.95049e+07	505030152	0.918299		2	AVG_emetine_2	1085.53	21205.3	3188.09	2.3019e+07	596017421	1.08374		2	AVG_anisomycin_2	1295.09	7151.85	2186.9	9.26228e+06	239823106	0.436072
	3	AVG_OPP_3	1077.03	13682.8	3703.02	1.47368e+07	381571757	0.693814		3	AVG_emetine_3	896.478	16132	3944.8	1.4462e+07	374456898	0.680877		3	AVG_anisomycin_3	918.763	8151.63	1897.79	7.48941e+06	193919090	0.352604
	4	AVG_OPP_4	1490.71	13215.2	2024.86	1.97e+07	510081623	0.927484		4	AVG_emetine_4	1448.3	19204.6	5756.97	2.7814e+07	720172481	1.30949		4	AVG_anisomycin_4	1087.61	10186.6	2366.69	1.10791e+07	286865869	0.52161
	5	AVG_OPP_5	1300.42	14029.9	2461.31	1.82448e+07	472401902	0.858971		5	AVG_emetine_5	1162.19	19482.8	5299.86	2.26428e+07	586277375	1.06603		5	AVG_anisomycin_5	1051.89	5288.64	1290.47	5.56307e+06	144041384	0.261911
	6	AVG_OPP_6	1708.72	13902.6	2320.34	2.37556e+07	615090851	1.11842		6	AVG_emetine_6	1301.38	18024.2	4948.89	2.34564e+07	607342419	1.10433		6	AVG_anisomycin_6	967.31	7844.03	2057.88	7.5876e+06	196461521	0.357227
	7	AVG_OPP_7	1568.49	19658.7	4333.83	3.08344e+07	7.98378e+08	1.45169		7	AVG_emetine_7	852.952	24328.8	6395.95	2.07513e+07	537301862	0.976979		7	AVG_anisomycin_7	820.51	9045.62	2167.7	7.42202e+06	192174103	0.349431
	8	AVG_OPP_8	1581.5	16305	3542.35	2.57864e+07	667671550	1.21403		8	AVG_emetine_8	1212.36	18870.5	3654.93	2.28778e+07	592363229	1.0771		8	AVG_anisomycin_8	878.751	8506.91	1996.31	7.47546e+06	193557815	0.351947
	9	AVG_OPP_9	1285.59	16655.6	2584.04	2.14122e+07	554414093	1.00809		9	AVG_emetine_9	1476.65	22198.5	3895.16	3.27794e+07	848738375	1.54327		9	AVG_anisomycin_9	1111.83	7378.88	1937.84	8.20407e+06	212423286	0.38625
	10	AVG_OPP_10	1985.99	14985.1	2485.18	2.97602e+07	770563995	1.40112		10	AVG_emetine_10	1201.35	19760.3	3462.49	2.37391e+07	614663482	1.11765		10	AVG_anisomycin_10	1057.88	7340.64	2096.78	7.76549e+06	201067571	0.365602
	11	AVG_OPP_11	1710.11	12494	2522.57	2.13662e+07	553222269	1.00593		11	AVG_emetine_11	970.129	22682.1	5695.88	2.20046e+07	569751629	1.03598		11	AVG_anisomycin_11	1202.4	7381.76	1502.12	8.87581e+06	229816416	0.417876
	12	AVG_OPP_12	1450.31	9264.23	1486.23	1.3436e+07	347890439	0.632571		12	AVG_emetine_12	917.99	12432.9	2432.6	1.14133e+07	295517830	0.537342		12	AVG_anisomycin_12	1010.41	9335.13	2077.62	9.43232e+06	244225631	0.444077
	13	AVG_OPP_13	1722.9	16522.6	2364.75	2.84667e+07	737071432	1.34022		13	AVG_emetine_13	890.801	16315.4	2594.49	1.45337e+07	376313999	0.684254		13	AVG_anisomycin_13	831.942	10560.4	2997.77	8.78563e+06	227481401	0.413631
	14	AVG_OPP_14	1643.38	9994.13	1839.38	1.64241e+07	425260264	0.773253		14	AVG_emetine_14	925.83	19764.2	5720.2	1.82983e+07	473786542	0.861489		14	AVG_anisomycin_14	1114.5	8259.46	1807.82	9.20513e+06	238343351	0.433381
	15	AVG_OPP_15	1787.97	15349.2	2927.16	2.74441e+07	710593424	1.29208		15	AVG_emetine_15	1055.6	19501.1	4687.79	2.05853e+07	5.33004e+08	0.969165		15	AVG_anisomycin_15	941.433	7363.05	2011.97	6.93182e+06	179481600	0.326352
	16	AVG_OPP_16	1290.88	14514.3	2497.53	1.87362e+07	485124635	0.882105		16	AVG_emetine_16	1071.09	21447.8	3460.9	2.29724e+07	594810469	1.08155		16	AVG_anisomycin_16	1148.68	9689.88	2186.88	1.11305e+07	288196351	0.524029
	17	AVG_OPP_17	1115.81	17339.3	2850.68	1.93474e+07	500950983	0.910882
	18	AVG_OPP_18	1420.3	16141.6	3131.25	2.29259e+07	593606965	1.07936
	19	AVG_OPP_19	1500.79	15205.9	3369.75	2.28208e+07	590885185	1.07441
	20	AVG_OPP_20	1463.05	14001.2	2135.89	2.04846e+07	530395159	0.96442
	21	AVG_OPP_21	1393.92	11052.5	1679.39	1.54063e+07	398907416	0.725336
	22	AVG_OPP_22	1744.33	7460.1	3228.76	1.30129e+07	336935407	0.612652
	23	AVG_OPP_23	1749.74	13100.5	2171.53	2.29225e+07	593519607	1.0792
	24	AVG_OPP_24	1234.14	14087	2666.9	1.73854e+07	450150394	0.818511

## Sheet: Replicate 2
Figure 2-source data 1		Note: "Normalized IntDen" values used for Figure 2B plot
Figure 2B		OPP	area	mean	stdev	intden	rawintden	normalized int den		EMETINE	area	mean	stdev	intden	rawintden	normalized int den		ANISOMYCIN	area	mean	stdev	intden	rawintden	normalized int den
Replicate 2	1	AVG_OPP_1	874.738	11632.5	2825.6	1.01754e+07	2065576570	1.29271	1	AVG_Emetine_1	837.339	9198.24	1942.57	7.70204e+06	1563489064	0.978488	1	AVG_ANISOMYCIN_1	938.242	3328.39	516.574	3.12284e+06	633925747	0.396734
	2	AVG_OPP_2	721.002	8240.52	1604.25	5.94143e+06	1206091324	0.754816	2	AVG_Emetine_2	941.813	12306.2	2457.61	1.15901e+07	2352755759	1.47244	2	AVG_ANISOMYCIN_2	741.032	3331.46	486.974	2.46872e+06	501141453	0.313632
	3	AVG_OPP_3	885.428	8707.76	1693.32	7.71009e+06	1565123410	0.979511	3	AVG_Emetine_3	1004.51	10029.9	1598.1	1.00752e+07	2045222536	1.27997	3	AVG_ANISOMYCIN_3	1409.09	2863.77	385.972	4.03532e+06	819157023	0.512658
	4	AVG_OPP_4	897.118	7843.07	1488.59	7.03616e+06	1428317922	0.893893	4	AVG_Emetine_4	839.25	11612.7	2562.6	9.74593e+06	1978392403	1.23815	4	AVG_ANISOMYCIN_4	1489.87	2964.05	389.092	4.41603e+06	896440214	0.561025
	5	AVG_OPP_5	1180	6458.07	971.135	7.62052e+06	1546941429	0.968132	5	AVG_Emetine_5	1023.4	11554.6	2178.36	1.1825e+07	2400443224	1.50228	5	AVG_ANISOMYCIN_5	1255.19	2048.2	263.628	2.57089e+06	5.21882e+08	0.326613
	6	AVG_OPP_6	999.479	8749.14	1655.19	8.74459e+06	1775122574	1.11094	6	AVG_Emetine_6	1062.74	10929.4	2298.81	1.16151e+07	2357822064	1.47561	6	AVG_ANISOMYCIN_6	1273.81	2596.34	281.337	3.30726e+06	671362716	0.420163
	7	AVG_OPP_7	896.074	9203.1	1633.53	8.24665e+06	1674043099	1.04768	7	AVG_Emetine_7	1083.29	11779.3	3032.29	1.27604e+07	2590322051	1.62112	7	AVG_ANISOMYCIN_7	1487.24	2353.08	210.477	3.49958e+06	710403241	0.444596
																	8	AVG_ANISOMYCIN_8	1155.13	3147.33	435.228	3.63558e+06	738011625	0.461874
