# Supplementary material for: Puromycin reactivity does not accurately localize translation at the subcellular level
Source: eLife. 2020 Aug 26;9:e60303. doi: 10.7554/eLife.60303 (PMC7490009; doi:10.7554/eLife.60303)
Supplement: Figure 3—figure supplement 1—source data 1. [file elife-60303-fig3-figsupp1-data1.xlsx]

## Sheet: Fig 3-S1A
Figure 3-figure supplement 1-source data 1
Figure 3-figure supplement 1A	Time (min)	No antibiotic (AU)	PM (AU)	EME (AU)	ANS (AU)
	0	2	3	3	4
	0.15	5	4	5	4
	0.3	5	4	4	4
	0.45	5	5	6	5
	0.6	5	5	5	4
	0.75	5	6	4	7
	0.9	5	5	4	4
	1.05	5	5	4	5
	1.2	5	5	5	4
	1.35	6	5	5	5
	1.5	5	5	5	6
	1.65	5	5	5	5
	1.8	5	5	5	5
	1.95	5	5	6	5
	2.1	5	5	5	4
	2.25	5	6	5	5
	2.4	5	5	6	6
	2.55	5	6	5	5
	2.7	4	5	4	5
	2.85	5	4	5	6
	3	5	5	6	6
	3.15	4	4	6	5
	3.3	5	5	6	6
	3.45	5	5	6	5
	3.6	5	5	5	5
	3.75	5	5	4	6
	3.9	6	4	5	5
	4.05	4	5	7	5
	4.2	6	5	4	4
	4.35	6	5	5	4
	4.5	6	5	4	5
	4.65	4	5	5	6
	4.8	5	4	5	6
	4.95	4	5	6	5
	5.1	6	6	5	5
	5.25	5	6	5	5
	5.4	5	5	5	5
	5.55	6	5	6	5
	5.7	5	5	5	7
	5.85	5	5	4	6
	6	5	5	4	5
	6.15	5	5	5	6
	6.3	5	5	7	6
	6.45	5	4	5	5
	6.6	5	5	6	5
	6.75	7	6	6	6
	6.9	7	6	5	5
	7.05	6	6	4	6
	7.2	5	6	6	6
	7.35	6	5	5	6
	7.5	7	7	6	7
	7.65	5	6	7	6
	7.8	5	6	5	6
	7.95	5	5	5	5
	8.1	6	5	5	5
	8.25	5	5	6	6
	8.4	5	5	5	6
	8.55	4	5	6	5
	8.7	6	5	6	5
	8.85	6	4	5	6
	9	5	7	5	5
	9.15	5	5	5	6
	9.3	6	5	5	5
	9.45	5	7	6	6
	9.6	5	5	5	4
	9.75	5	6	5	5
	9.9	6	5	4	4
	10.05	5	5	4	8
	10.2	5	5	5	5
	10.35	6	5	5	7
	10.5	5	5	5	4
	10.65	4	5	5	5
	10.8	5	5	5	6
	10.95	5	7	5	7
	11.1	6	5	5	10
	11.25	5	8	6	10
	11.4	6	7	8	11
	11.55	7	7	13	18
	11.7	12	9	12	26
	11.85	12	16	17	33
	12	19	22	23	45
	12.15	21	23	34	63
	12.3	31	33	44	85
	12.45	50	54	51	104
	12.6	63	67	79	138
	12.75	84	80	90	163
	12.9	102	103	112	219
	13.05	131	131	141	262
	13.2	145	158	152	301
	13.35	197	189	227	345
	13.5	226	219	253	393
	13.65	277	275	311	490
	13.8	314	320	358	518
	13.95	371	380	373	576
	14.1	388	410	416	639
	14.25	443	467	495	733
	14.4	517	529	525	768
	14.55	577	558	602	884
	14.7	624	598	635	868
	14.85	686	666	662	988
	15	763	724	759	1042
	15.15	812	798	828	1167
	15.3	839	820	856	1196
	15.45	947	894	917	1265
	15.6	1009	911	969	1347
	15.75	1052	969	1029	1434
	15.9	1124	1045	1079	1448
	16.7333	1349	1212	1074	1452
	16.8833	1433	1235	971	1328
	17.0333	1432	1296	868	1304
	17.1833	1455	1373	788	1264
	17.3333	1502	1346	722	1253
	17.4833	1609	1462	704	1163
	17.6333	1645	1470	651	1167
	17.7833	1669	1536	594	1146
	17.9333	1763	1564	607	1146
	18.0833	1755	1589	582	1090
	18.2333	1845	1629	553	1126
	18.3833	1848	1686	541	1090
	18.5333	1965	1696	545	1053
	18.6833	1965	1743	555	1057
	18.8333	2068	1829	525	1061
	18.9833	2128	1837	532	1052
	19.1333	2138	1845	546	1016
	19.2833	2131	1937	536	975
	19.4333	2167	1964	541	957
	19.5833	2271	1957	541	1010
	19.7333	2249	2019	520	996
	19.8833	2281	2033	517	976
	20.0333	2343	2018	517	987
	20.1833	2356	2076	515	997
	20.3333	2481	2110	540	919
	20.4833	2414	2176	506	937
	20.6333	2462	2199	517	936
	20.7833	2543	2249	509	938
	20.9333	2591	2230	549	933
	21.0833	2565	2249	530	964
	21.2333	2619	2329	519	943
	21.3833	2689	2271	523	920
	21.5333	2733	2325	539	957
	21.6833	2697	2352	529	971
	22.75	2634	2472	482	920
	22.9	2719	2361	513	925
	23.05	2687	2317	518	878
	23.2	2780	2242	524	879
	23.35	2696	2227	510	883
	23.5	2692	2222	495	911
	23.65	2762	2183	500	878
	23.8	2756	2161	500	890
	23.95	2749	2088	510	893
	24.1	2748	2073	520	905
	24.25	2836	2028	492	893
	24.4	2783	2045	520	925
	24.55	2817	1986	539	901
	24.7	2789	1978	509	925
	24.85	2823	2045	486	921
	25	2846	1955	489	899
	25.15	2806	1959	491	880
	25.3	2848	1946	528	900
	25.45	2933	1939	487	891
	25.6	2889	1868	499	892
	25.75	2934	1951	509	903
	25.9	2967	1884	512	913
	26.05	2912	1906	536	869
	26.2	2908	1904	517	884
	26.35	2992	1904	519	918
	26.5	2939	1898	467	929
	26.65	2946	1903	528	918
	26.8	2948	1875	499	919
	26.95	2959	1823	513	953
	27.1	3004	1865	527	902
	27.25	2978	1867	527	910
	27.4	3122	1841	525	937
	27.55	3053	1876	501	900
	27.7	3020	1908	529	968
	27.85	3065	1899	530	935
	28	3051	1874	515	930
	28.15	3022	1815	527	946
	28.3	3088	1895	507	926
	28.45	3047	1898	496	913
	28.6	3148	1804	525	953
	28.75	3111	1871	517	929
	28.9	3126	1879	528	916
	29.05	3132	1840	522	928
	29.2	3191	1880	531	936
	29.35	3165	1861	510	900
	29.5	3238	1844	526	909
	29.65	3180	1922	518	965
	29.8	3146	1867	521	924
	29.95	3184	1852	527	935
	30.1	3224	1847	539	935
	30.25	3261	1857	518	945
	30.4	3230	1890	535	913
	30.55	3226	1877	531	929
	30.7	3373	1870	527	960
	30.85	3299	1905	541	962
	31	3276	1887	538	977
	31.15	3310	1857	530	915
	31.3	3215	1843	543	950
	31.45	3285	1874	522	944
	31.6	3291	1909	520	948
	31.75	3390	1883	523	946
	31.9	3361	1919	548	934
	32.05	3367	1913	517	910
	32.2	3359	1903	523	979
	32.35	3377	1889	547	938
	32.5	3410	1893	533	908
	32.65	3367	1888	552	942
	32.8	3481	1883	541	923
	32.95	3410	1927	549	943
	33.1	3406	1888	551	950
	33.25	3384	1877	534	955
	33.4	3366	1927	544	917
	33.55	3521	1881	512	987
	33.7	3465	1945	536	959
	33.85	3456	1827	524	967
	34	3432	1883	540	938
	34.15	3457	1880	549	970
	34.3	3545	1921	521	936
	34.45	3433	1888	538	939
	34.6	3473	1840	524	924
	34.75	3490	1861	539	899
	34.9	3551	1894	521	928
	35.05	3495	1894	540	936
	35.2	3473	1895	532	956
	35.35	3524	1889	565	955
	35.5	3515	1881	530	924
	35.65	3520	1893	542	935
	35.8	3489	1888	527	931
	35.95	3524	1902	539	939
	36.1	3532	1951	529	957
	36.25	3488	1919	519	939
	36.4	3527	1894	525	963
	36.55	3545	1920	533	972
	36.7	3600	1902	537	980
	36.85	3457	1892	537	942
	37	3524	1849	545	924
	37.15	3480	1893	546	929
	37.3	3480	1869	547	921
	37.45	3470	1902	552	940
	37.6	3456	1816	542	891
	37.75	3417	1931	505	922
	37.9	3544	1884	531	938
	38.05	3445	1856	571	943
	38.2	3491	1901	526	940
	38.35	3481	1882	516	959
	38.5	3533	1860	533	944
	38.65	3452	1874	543	922
	38.8	3584	1902	533	906
	38.95	3501	1856	510	892
	39.1	3434	1885	537	954
	39.25	3490	1909	503	930
	39.4	3540	1928	516	938
	39.55	3485	1884	541	980
	39.7	3495	1917	541	932
	39.85	3457	1889	536	954
	40	3504	1899	534	942
	40.15	3479	1867	516	950
	40.3	3441	1899	537	930
	40.45	3470	1893	531	939
	40.6	3516	1823	525	924
	40.75	3458	1873	535	940
	40.9	3420	1888	548	947
	41.05	3427	1856	525	883
	41.2	3504	1853	531	963
	41.35	3481	1847	555	939
	41.5	3463	1844	548	986
	41.65	3470	1898	541	918
	41.8	3475	1846	537	926
	41.95	3464	1871	520	891
	42.1	3516	1873	529	934
	42.25	3472	1880	529	931
	42.4	3386	1906	533	941
	42.55	3462	1855	525	958
	42.7	3470	1891	535	966
	42.85	3496	1891	547	956
	43	3451	1865	542	972
	43.15	3437	1875	520	927
	43.3	3553	1865	532	922
	43.45	3535	1866	535	923
	43.6	3469	1862	526	948
	43.75	3488	1871	510	927
	43.9	3390	1816	541	964
	44.05	3470	1918	517	937
	44.2	3474	1892	525	931
	44.35	3481	1874	551	920
	44.5	3402	1914	543	924
	44.65	3472	1850	542	940
	44.8	3421	1882	526	912
	44.95	3463	1863	538	942
	45.1	3442	1868	520	973
	45.25	3368	1876	531	910
	45.4	3475	1843	550	955
	45.55	3397	1892	563	948
	45.7	3416	1831	560	944
	45.85	3470	1812	522	922
	46	3445	1866	535	918
	46.15	3420	1830	535	937
	46.3	3429	1846	534	939
	46.45	3354	1899	529	955
	46.6	3418	1851	545	946
	46.75	3473	1847	524	935
	46.9	3419	1847	542	917
	47.05	3381	1789	544	931
	47.2	3407	1862	540	945
	47.35	3394	1809	508	946
	47.5	3411	1851	548	911
	47.65	3413	1837	550	936
	47.8	3421	1877	522	942
	47.95	3377	1826	549	936
	48.1	3395	1803	555	938
	48.25	3419	1823	539	936
	48.4	3394	1841	543	968
	48.55	3342	1805	546	944
	48.7	3376	1820	521	904
	48.85	3349	1831	533	939
	49	3441	1815	539	933
	49.15	3418	1775	521	927
	49.3	3381	1803	534	909
	49.45	3364	1817	538	935
	49.6	3401	1787	550	913
	49.75	3351	1818	572	916
	49.9	3371	1801	515	955
	50.05	3404	1774	537	905
	50.2	3354	1785	535	923
	50.35	3375	1810	529	912
	50.5	3359	1847	524	949
	50.65	3392	1785	525	933
	50.8	3319	1816	541	904
	50.95	3346	1839	538	948
	51.1	3319	1785	515	922
	51.25	3342	1838	514	921
	51.4	3364	1852	530	891
	51.55	3354	1820	524	908
	51.7	3350	1791	527	951
	51.85	3332	1829	522	919
	52	3342	1813	529	930
	52.15	3371	1806	517	906
	52.3	3341	1813	529	886
	52.45	3335	1797	514	899
	52.6	3364	1800	544	927
	52.75	3306	1844	556	913
	52.9	3296	1790	519	898
	53.05	3344	1797	519	944
	53.2	3314	1833	522	919
	53.35	3283	1772	538	964
	53.5	3343	1801	537	936
	53.65	3343	1776	535	955
	53.8	3356	1807	513	924
	53.95	3316	1772	570	925
	54.1	3290	1759	540	892
	54.25	3280	1780	537	882
	54.4	3318	1740	538	929
	54.55	3306	1800	532	924
	54.7	3255	1819	528	926
	54.85	3316	1773	534	924
	55	3304	1790	510	889
	55.15	3280	1759	506	896
	55.3	3269	1768	530	900
	55.45	3266	1790	538	926
	55.6	3299	1790	527	910
	55.75	3228	1791	535	902
	55.9	3250	1757	545	915
	56.05	3314	1789	516	918
	56.2	3259	1796	531	913
	56.35	3288	1769	517	884
	56.5	3270	1781	530	896
	56.65	3277	1761	541	911
	56.8	3308	1707	530	911
	56.95	3265	1788	544	885
	57.1	3230	1763	535	926
	57.25	3262	1771	529	951
	57.4	3266	1764	557	876
	57.55	3307	1745	526	922
	57.7	3267	1741	524	928
	57.85	3275	1765	529	885
	58	3255	1757	525	928
	58.15	3247	1758	534	928
	58.3	3257	1738	492	913
	58.45	3256	1758	529	924
	58.6	3234	1783	523	892
	58.75	3250	1745	543	906
	58.9	3200	1805	526	885
	59.05	3201	1738	519	908
	59.2	3200	1759	518	899
	59.35	3186	1790	531	928
	59.5	3239	1721	505	935
	59.65	3199	1683	542	919
	59.8	3268	1758	499	911
	59.95	3264	1732	533	905
	60.1	3198	1745	495	922
	60.25	3214	1788	524	891
	60.4	3213	1728	510	928
	60.55	3215	1727	520	904
	60.7	3246	1756	521	890
	60.85	3278	1748	530	905
	61	3215	1688	534	910
	61.15	3162	1664	519	904
	61.3	3216	1756	516	890
	61.45	3247	1723	510	882
	61.6	3137	1739	547	906
	61.75	3155	1726	526	911
	61.9	3194	1744	539	920
	62.05	3149	1731	532	899
	62.2	3167	1717	520	871
	62.35	3171	1692	528	889
	62.5	3110	1747	540	923
	62.65	3189	1717	505	895
	62.8	3191	1747	511	890
	62.95	3195	1716	528	854
	63.1	3186	1729	510	938
	63.25	3220	1712	507	884
	63.4	3165	1673	508	869
	63.55	3164	1681	528	902
	63.7	3141	1689	502	870
	63.85	3156	1731	527	899
	64	3235	1730	519	884
	64.15	3170	1735	537	889
	64.3	3223	1694	510	911
	64.45	3156	1697	514	894
	64.6	3171	1718	523	894
	64.75	3106	1681	533	874
	64.9	3135	1667	542	887
	65.05	3158	1682	539	865
	65.2	3149	1681	510	873
	65.35	3152	1711	531	895
	65.5	3074	1747	521	871
	65.65	3122	1719	520	830
	65.8	3141	1732	534	883
	65.95	3047	1689	517	929
	66.1	3138	1659	518	887
	66.25	3004	1714	515	891
	66.4	3140	1685	517	870
	66.55	3139	1711	512	916
	66.7	3071	1674	520	888
	66.85	3170	1691	515	893
	67	3110	1685	519	853
	67.15	3083	1669	527	890
	67.3	3138	1685	529	880
	67.45	3100	1674	504	887
	67.6	3143	1663	517	882
	67.75	3084	1660	539	900
	67.9	3086	1718	515	892
	68.05	3128	1691	529	889
	68.2	3078	1663	516	900
	68.35	3090	1670	521	912
	68.5	3111	1692	529	884
	68.65	3046	1662	515	917
	68.8	3102	1699	544	840
	68.95	3113	1649	530	894
	69.1	3083	1707	536	918
	69.25	3119	1655	515	858
	69.4	3123	1694	523	880
	69.55	3001	1668	527	875
	69.7	3131	1690	520	865
	69.85	3017	1676	512	875
	70	3028	1666	533	889
	70.15	3054	1653	517	883
	70.3	3067	1685	511	887
	70.45	3094	1697	528	862
	70.6	3080	1660	518	871
	70.75	3033	1666	542	866
	70.9	3128	1642	512	875
	71.05	3077	1716	494	837
	71.2	3025	1618	522	876
	71.35	3005	1673	529	871
	71.5	3029	1654	508	848
	71.65	3043	1641	510	875
	71.8	3053	1649	508	868
	71.95	3121	1641	523	889
	72.1	3048	1651	488	888
	72.25	3046	1666	510	890
	72.4	3023	1666	529	865
	72.55	2985	1648	522	855
	72.7	3025	1650	507	871
	72.85	3068	1683	511	877
	73	3058	1648	502	874
	73.15	2998	1682	525	898
	73.3	2955	1658	535	848
	73.45	2988	1680	495	845
	73.6	3022	1610	536	875
	73.75	3001	1657	533	863
	73.9	3021	1639	510	857
	74.05	3021	1621	516	881
	74.2	2963	1601	519	864
	74.35	2952	1586	505	886
	74.5	2965	1654	503	867
	74.65	3024	1615	531	868
	74.8	2999	1639	502	898
	74.95	2948	1631	527	853
	75.1	2980	1635	541	865
	75.25	2938	1612	519	861
	75.4	2981	1606	530	862
	75.55	2957	1615	491	853
	75.7	2951	1641	501	844
	75.85	2951	1602	526	898
	76	3011	1596	517	853
	76.15	2998	1652	525	864
	76.3	2928	1635	520	872
	76.45	2982	1613	515	864
	76.6	3003	1637	495	827
	76.75	2959	1575	516	857
	76.9	2961	1660	491	878
	77.05	2989	1595	538	833
	77.2	2964	1620	489	891
	77.35	2955	1610	486	857
	77.5	2940	1597	508	886
	77.65	2895	1589	534	875
	77.8	2918	1621	511	863
	77.95	2953	1622	508	885
	78.1	2910	1635	503	840
	78.25	2926	1648	520	873
	78.4	2910	1628	509	851
	78.55	2909	1610	512	856
	78.7	2885	1612	524	842
	78.85	2956	1612	498	842
	79	2897	1631	519	838
	79.15	2919	1579	520	859
	79.3	2894	1571	515	850
	79.45	2922	1622	520	873
	79.6	2956	1602	513	847
	79.75	2936	1594	504	877
	79.9	2926	1600	545	870
	80.05	2870	1593	539	821
	80.2	2903	1561	505	825
	80.35	2925	1585	511	872
	80.5	2934	1595	527	839
	80.65	2931	1564	482	863
	80.8	2911	1577	513	826
	80.95	2854	1550	493	851
	81.1	2860	1548	508	838
	81.25	2915	1578	486	856
	81.4	2920	1599	494	854
	81.55	2906	1567	510	855
	81.7	2906	1558	499	850
	81.85	2865	1576	499	839
	82	2831	1543	514	848
	82.15	2914	1576	505	863
	82.3	2922	1580	509	828
	82.45	2877	1571	485	826
	82.6	2869	1523	513	835
	82.75	2860	1529	498	823

## Sheet: Fig 3-S1B
Figure 3-figure supplement 1-source data 1		Note: Mean values plotted
Figure 3-figure supplement 1B	Time (min)	ANS --> PM (AU)		PM --> H2O (AU)*		EME --> PM (AU)
	0	5	6	3	4	6	5		* the experiments in Figures 3A, 3B, and figure supplement 1B were done in the same batch, hence the data under "Truncated", "PM only" and "PM --> H2O" are the same
	0.2	6	3	5	5	5	6
	0.4	5	4	5	6	6	6
	0.6	5	5	5	5	5	5
	0.8	5	5	6	5	5	6
	1	6	5	4	5	6	4
	1.2	6	6	5	8	9	5
	1.4	5	5	4	4	4	5
	1.6	5	4	4	4	6	5
	1.8	6	6	6	8	6	6
	2	5	5	5	4	5	5
	2.2	5	5	5	5	5	7
	2.4	6	6	4	6	7	6
	2.6	5	5	4	5	4	6
	2.8	6	5	5	4	4	6
	3	5	4	5	5	6	8
	3.2	5	6	6	5	5	4
	3.4	4	5	3	4	5	5
	3.6	4	4	5	5	5	6
	3.8	4	6	5	6	5	5
	4	5	6	5	4	6	6
	4.2	6	4	6	6	5	5
	4.4	5	6	5	5	5	5
	4.6	5	6	4	5	6	5
	4.8	6	4	4	5	5	4
	5	7	5	6	4	5	6
	5.2	5	5	4	6	6	5
	5.4	5	5	5	6	4	4
	5.6	4	4	6	5	6	5
	5.8	5	5	6	6	4	4
	6	5	5	5	6	6	5
	6.2	6	6	5	4	6	6
	6.4	4	5	6	6	6	5
	6.6	6	5	5	7	6	6
	6.8	6	5	4	6	5	5
	7	5	5	4	5	5	7
	7.2	5	5	4	5	5	6
	7.4	5	6	4	5	5	4
	7.6	7	6	3	4	5	5
	7.8	5	5	6	5	7	5
	8	6	5	4	5	4	4
	8.2	5	4	5	5	4	5
	8.4	5	6	5	7	5	4
	8.6	5	7	5	5	5	5
	8.8	4	4	5	7	5	5
	9	5	5	7	5	6	5
	9.2	5	4	4	5	4	4
	9.4	5	5	4	6	5	6
	9.6	5	5	5	4	6	3
	9.8	6	5	5	5	5	7
	10	4	4	5	6	5	7
	10.2	5	5	5	6	6	6
	10.4	4	6	4	5	5	5
	10.6	5	5	6	5	4	4
	10.8	4	6	5	5	7	5
	11	4	5	6	6	4	5
	11.2	5	5	5	5	7	6
	11.4	7	6	7	5	6	5
	11.6	6	5	5	4	4	7
	11.8	6	5	7	5	6	7
	12	5	8	7	6	5	7
	12.2	5	7	6	6	6	7
	12.4	5	8	6	6	9	6
	12.6	7	9	6	6	6	6
	12.8	7	7	5	10	6	8
	13	9	6	8	12	9	9
	13.2	10	9	7	10	9	12
	13.4	8	10	8	8	7	11
	13.6	12	9	7	6	10	13
	13.8	8	14	8	13	7	12
	14	12	13	10	11	9	14
	14.2	10	15	11	13	11	12
	14.4	9	15	11	16	13	17
	14.6	16	13	15	15	14	18
	14.8	13	17	14	17	12	17
	15	15	15	14	23	16	20
	15.2	15	17	21	18	18	18
	15.4	17	19	18	18	16	23
	15.6	18	22	25	23	21	23
	15.8	19	28	16	26	21	24
	16	28	25	26	24	25	23
	16.2	23	32	33	27	26	30
	16.4	22	27	25	25	24	33
	16.6	22	38	37	31	26	42
	16.8	29	35	32	32	31	35
	17	34	37	30	29	33	36
	17.2	31	38	35	39	30	42
	17.4	38	41	33	41	32	45
	17.6	43	41	47	41	35	48
	17.8	42	41	41	44	46	46
	18	39	43	38	42	49	52
	18.2	36	57	48	52	48	44
	18.4	49	52	55	68	47	61
	18.6	45	51	49	53	41	62
	18.8	44	53	60	53	41	63
	19	48	54	54	60	55	56
	19.2	54	59	61	62	51	64
	19.4	56	60	60	54	54	61
	19.6	59	65	68	70	57	74
	19.8	65	75	71	65	63	67
	20	60	71	60	70	67	78
	20.2	70	69	67	85	74	84
	20.4	62	74	70	76	69	83
	20.6	69	68	74	77	64	73
	20.8	66	72	75	94	74	90
	21	68	77	71	70	78	88
	22.3	80	74	570	513	79	87
	22.5	77	74	527	487	79	84
	22.7	73	72	490	457	81	87
	22.9	79	65	470	448	79	87
	23.1	72	75	496	435	79	77
	23.3	64	69	433	445	79	89
	23.5	61	69	448	456	81	77
	23.7	70	77	438	431	86	81
	23.9	70	65	433	443	74	86
	24.1	65	64	428	446	80	81
	24.3	56	80	432	453	88	95
	24.5	66	76	425	445	77	97
	24.7	71	71	431	465	91	90
	24.9	64	77	451	443	88	97
	25.1	64	63	439	475	89	100
	25.3	63	71	444	466	88	108
	25.5	70	73	435	473	80	98
	25.7	64	73	430	463	85	107
	25.9	78	69	456	462	93	99
	26.1	65	69	455	489	102	99
	26.3	73	66	441	466	97	103
	26.5	65	69	486	489	91	98
	26.7	78	79	462	483	104	111
	26.9	68	82	478	474	109	106
	27.1	64	78	472	500	95	99
	27.3	75	85	483	485	98	92
	28.4667	79	100	473	494	227	326
	28.6667	82	113	491	456	245	328
	28.8667	78	105	479	476	252	341
	29.0667	91	115	486	508	266	330
	29.2667	91	103	471	487	281	343
	29.4667	85	97	490	497	282	331
	29.6667	96	111	494	484	295	334
	29.8667	119	112	497	516	295	350
	30.0667	114	110	476	511	287	356
	30.2667	119	114	483	508	310	360
	30.4667	93	118	502	531	297	354
	30.6667	113	124	445	522	304	366
	30.8667	119	111	493	520	308	358
	31.0667	111	117	487	527	310	373
	31.2667	117	104	506	510	334	363
	31.4667	118	115	511	526	316	393
	31.6667	118	120	477	517	313	401
	31.8667	104	127	495	547	336	365
	32.0667	113	134	538	546	351	409
	32.2667	112	127	520	507	322	406
	32.4667	117	138	538	543	358	394
	32.6667	111	131	541	545	344	395
	32.8667	123	134	523	543	351	429
	33.0667	128	138	553	559	377	435
	33.2667	127	137	519	531	357	446
	33.4667	112	135	541	577	369	444
	33.6667	132	130	547	557	393	426
	33.8667	133	138	537	545	394	438
	34.0667	122	159	548	567	401	445
	34.2667	123	144	557	574	381	450
	34.4667	118	140	546	535	387	484
	34.6667	130	161	562	580	409	447
	34.8667	122	145	584	614	405	485
	35.0667	120	152	529	595	427	500
	35.2667	127	155	570	591	429	490
	35.4667	127	144	547	586	437	525
	35.6667	133	142	557	563	416	511
	35.8667	151	146	558	571	436	500
	36.0667	140	160	555	626	439	520
	36.2667	146	160	594	591	473	539
	36.4667	143	153	582	583	474	486
	36.6667	132	161	573	614	467	538
	36.8667	155	155	568	584	454	540
	37.0667	151	161	589	590	462	534
	37.2667	163	167	564	602	489	520
	37.4667	147	161	602	618	466	560
	37.6667	159	166	582	618	488	551
	37.8667	146	171	581	637	515	588
	38.0667	154	166	582	629	498	546
	38.2667	147	167	585	614	502	538
	38.4667	166	177	645	632	511	556
	38.6667	148	158	596	621	515	569
	38.8667	152	180	636	622	535	559
	39.0667	165	180	630	613	521	578
	39.2667	171	180	614	622	532	603
	39.4667	149	178	617	636	553	584
	39.6667	166	176	648	646	553	591
	39.8667	178	183	626	656	530	591
	40.0667	183	166	628	653	552	601
	40.2667	167	183	627	644	552	608
	40.4667	157	178	612	627	535	605
	40.6667	160	186	608	630	536	611
	40.8667	182	173	610	659	554	638
	41.0667	172	174	634	659	571	638
	41.2667	168	184	610	667	585	648
	41.4667	178	197	633	644	595	629
	41.6667	172	192	628	627	570	643
	41.8667	168	188	631	672	573	626
	42.0667	178	201	621	642	563	657
	42.2667	190	186	601	682	585	668
	42.4667	152	200	634	632	578	671
	42.6667	182	202	643	692	614	666
	42.8667	173	186	638	674	600	647
	43.0667	167	217	638	712	614	707
	43.2667	185	203	631	688	600	656
	43.4667	178	212	618	708	620	679
	43.6667	187	187	663	666	609	697
	43.8667	188	208	632	665	641	708
	44.0667	195	210	613	678	609	705
	44.2667	195	207	628	671	642	703
	44.4667	190	204	639	694	640	672
	44.6667	196	224	637	673	661	711
	44.8667	184	217	621	647	651	732
	45.0667	218	227	626	701	664	665
	45.2667	187	227	657	680	675	691
	45.4667	209	236	678	682	701	737
	45.6667	195	228	682	668	662	709
	45.8667	221	238	662	689	659	707
	46.0667	199	228	666	730	671	706
	46.2667	224	225	640	681	657	748
	46.4667	211	212	620	670	662	717
	46.6667	204	237	637	652	664	707
	46.8667	223	221	643	717	675	751
	47.0667	236	207	677	727	651	754
	47.2667	228	230	639	716	679	718
	47.4667	215	239	652	716	709	765
	47.6667	219	261	659	720	689	762
	47.8667	215	234	665	716	666	762
	48.0667	212	241	670	696	710	744
	48.2667	225	239	659	729	706	792
	48.4667	220	253	671	709	690	756
	48.6667	220	247	695	751	698	783
	48.8667	232	233	660	724	705	774
	49.0667	225	243	658	726	742	743
	49.2667	227	238	653	717	721	772
	49.4667	233	238	690	694	700	793
	49.6667	222	251	660	716	696	796
	49.8667	241	242	648	691	733	773
	50.0667	241	284	695	684	719	789
	50.2667	239	253	685	716	692	787
	50.4667	251	273	651	701	692	783
	50.6667	253	250	693	746	687	789
	50.8667	245	241	673	728	730	793
	51.0667	258	237	694	717	758	776
	51.2667	240	244	675	743	750	810
	51.4667	255	259	668	716	723	807
	51.6667	246	256	664	749	703	801
	51.8667	269	280	672	719	754	807
	52.0667	246	251	673	744	731	745
	52.2667	244	279	682	707	737	841
	52.4667	232	274	678	716	718	850
	52.6667	262	264	696	711	742	814
	52.8667	239	268	686	713	755	798
	53.0667	255	259	678	757	746	818
	53.2667	237	275	664	743	758	808
	53.4667	263	277	677	716	755	813
	53.6667	264	277	684	705	762	797
	53.8667	255	265	692	730	766	828
	54.0667	262	280	709	728	739	828
	54.2667	247	279	663	724	747	788
	54.4667	267	261	670	740	787	829
	54.6667	259	275	699	716	754	837
	54.8667	275	271	668	745	768	825
	55.0667	261	288	677	729	767	803
	55.2667	268	265	674	695	785	822
	55.4667	278	281	687	756	758	852
	55.6667	264	292	661	737	778	811
	55.8667	280	268	696	753	763	859
	56.0667	274	287	706	765	761	814
	56.2667	278	308	692	718	792	833
	56.4667	289	301	682	766	762	853
	56.6667	279	284	669	744	769	841
	56.8667	271	297	685	734	759	806
	57.0667	287	283	679	726	806	849
	57.2667	279	313	681	736	754	860
	57.4667	266	298	696	764	733	819
	57.6667	283	307	691	731	789	826
	57.8667	281	287	670	749	753	843
	58.0667	291	283	680	745	783	847
	58.2667	299	282	691	790	782	862
	58.4667	281	293	673	763	785	845
	58.6667	298	304	698	742	762	826
	58.8667	284	311	695	741	782	800
	59.0667	287	329	679	760	800	832
	59.2667	300	313	694	753	783	849
	59.4667	273	320	704	742	786	843
	59.6667	312	322	697	754	774	887
	59.8667	291	318	742	749	797	851
	60.0667	288	316	706	789	771	854
	60.2667	315	316	683	719	762	871
	60.4667	302	309	717	761	802	823
	60.6667	302	344	711	739	784	830
	60.8667	285	312	744	755	806	843
	61.0667	291	317	727	742	765	829
	61.2667	316	320	700	769	752	857
	61.4667	297	323	715	752	755	868
	61.6667	305	313	711	789	762	859
	61.8667	308	327	718	780	775	860
	62.0667	298	328	676	759	783	880
	62.2667	315	350	679	738	773	836
	62.4667	339	343	668	740	824	819
	62.6667	300	317	696	729	762	862
	62.8667	317	355	706	742	820	843
	63.0667	308	341	729	757	788	866
	63.2667	304	351	727	746	778	882
	63.4667	314	325	682	764	791	825
	63.6667	326	368	706	771	800	840
	63.8667	328	330	668	773	767	817
	64.0667	302	321	705	758	771	867
	64.2667	322	355	758	728	801	802
	64.4667	336	332	710	787	761	822
	64.6667	324	351	680	757	808	824
	64.8667	314	353	726	749	772	860
	65.0667	316	345	701	792	784	876
	65.2667	334	340	697	802	756	839
	65.4667	332	342	686	772	776	838
	65.6667	327	351	688	776	785	814
	65.8667	350	352	724	766	763	842
	66.0667	344	334	693	747	782	849
	66.2667	329	360	705	752	822	880
	66.4667	353	366	714	759	783	884
	66.6667	337	352	688	779	815	867
	66.8667	340	357	714	755	806	841
	67.0667	350	352	673	771	770	856
	67.2667	304	338	726	763	800	876
	67.4667	355	371	713	751	763	850
	67.6667	347	352	730	777	775	847
	67.8667	324	375	723	760	770	855
	68.0667	329	342	686	755	773	865
	68.2667	353	369	728	795	804	850
	68.4667	341	354	712	766	732	874
	68.6667	355	386	708	742	771	842
	68.8667	341	371	706	778	787	841
	69.0667	360	363	676	785	790	879
	69.2667	354	399	688	785	763	872
	69.4667	381	354	693	787	780	842
	69.6667	345	379	691	772	756	837
	69.8667	362	380	740	766	789	848
	70.0667	347	369	753	781	797	853
	70.2667	348	370	720	799	802	858
	70.4667	332	367	708	748	800	848
	70.6667	381	382	705	781	786	866
	70.8667	355	366	740	759	785	855
	71.0667	356	361	689	775	796	861
	71.2667	374	387	718	746	808	835
	71.4667	372	353	727	768	794	849
	71.6667	374	379	705	774	763	845
	71.8667	370	379	709	780	805	881
	72.0667	371	408	718	792	801	867
	72.2667	386	382	680	768	802	877
	72.4667	375	416	681	777	785	834
	72.6667	366	413	714	790	803	850
	72.8667	374	370	711	784	779	865
	73.0667	396	406	700	754	799	867
	73.2667	380	383	684	764	819	850
	73.4667	366	376	691	783	758	836
	73.6667	405	393	706	748	797	862
	73.8667	393	391	694	801	794	852
	74.0667	375	406	711	752	820	845
	74.2667	409	377	722	734	820	882
	74.4667	402	422	734	732	810	825
	74.6667	395	389	670	781	811	876
	74.8667	371	379	694	750	826	852
	75.0667	381	411	727	763	795	866
	75.2667	399	376	706	762	800	887
	75.4667	395	376	708	794	798	885
	75.6667	379	430	692	771	781	821
	75.8667	397	425	717	778	797	870
	76.0667	380	408	680	761	761	815
	76.2667	401	409	697	797	821	858
	76.4667	379	403	746	775	765	839
	76.6667	388	414	710	779	799	825
	76.8667	375	442	720	790	795	883
	77.0667	402	404	726	774	801	892
	77.2667	391	423	721	783	834	876
	77.4667	398	424	721	782	776	860
	77.6667	409	416	700	764	825	840
	77.8667	417	414	731	773	786	827
	78.0667	407	457	727	751	765	834
	78.2667	401	434	711	792	795	863
	78.4667	383	431	718	784	802	846
	78.6667	414	436	740	762	782	847
	78.8667	417	433	693	785	798	850
	79.0667	386	393	690	778	793	843
	79.2667	404	440	691	773	784	843
	79.4667	418	435	712	775	767	853
	79.6667	383	421	682	779	783	839
	79.8667	403	442	708	752	789	845
	80.0667	419	439	712	754	770	846
	80.2667	410	404	749	760	804	917
	80.4667	419	416	709	757	780	848
	80.6667	421	408	732	781	764	816
	80.8667	397	436	726	794	787	839
	81.0667	410	433	695	734	810	842
	81.2667	398	449	719	766	797	831
	81.4667	428	467	703	776	803	866
	81.6667	415	456	734	815	817	845
	81.8667	441	446	716	757	749	894
	82.0667	425	462	715	760	796	828
	82.2667	422	454	738	755	840	857
	82.4667	417	456	719	723	788	822
	82.6667	428	433	722	775	788	842
	82.8667	404	446	727	780	800	865
	83.0667	440	437	710	782	775	855
	83.2667	410	418	692	728	783	809
	83.4667	391	463	692	787	810	852
	83.6667	410	456	694	745	785	837
	83.8667	394	451	737	764	797	887
	84.0667	461	444	698	785	779	832
	84.2667	403	474	700	762	763	810
	84.4667	444	470	699	794	804	839
	84.6667	412	451	706	756	809	811
	84.8667	444	443	699	763	799	862
	85.0667	429	446	696	755	778	824
	85.2667	443	468	784	806	779	849
	85.4667	436	448	736	796	786	857
	85.6667	422	467	749	764	792	834
	85.8667	446	474	704	775	832	860
	86.0667	450	469	693	772	814	856
	86.2667	422	459	691	781	785	851
	86.4667	432	445	719	835	808	817
	86.6667	420	469	718	777	793	873
	86.8667	461	472	686	752	789	863
	87.0667	461	468	700	755	808	821
	87.2667	435	440	690	778	799	846
	87.4667	450	471	686	733	770	838
	87.6667	441	465	719	735	770	860
	87.8667	460	491	728	728	778	827
	88.0667	452	482	701	752	800	864
	88.2667	431	472	710	764	810	825
	88.4667	456	477	725	776	794	844
