# Supplementary material for: Puromycin reactivity does not accurately localize translation at the subcellular level
Source: eLife. 2020 Aug 26;9:e60303. doi: 10.7554/eLife.60303 (PMC7490009; doi:10.7554/eLife.60303)
Supplement: Figure 3—source data 1. [file elife-60303-fig3-data1.xlsx]

## Sheet: Fig 3A
Figure 3-source data 1		Note: Mean values plotted
Figure 3A	Time (min)	Full-length (AU)**		Truncated (AU)*
	0	2		3	4		* the experiments in Figures 3A, 3B, and figure supplement 1B were done in the same batch, hence the data under "Truncated", "PM only" and "PM --> H2O" are the same
	0.2	4		5	5
	0.4	6		5	6
	0.6	5		5	5
	0.8	7		6	5		** Experiment performed once (whereas "Truncated" performed in duplicate)
	1	7		4	5
	1.2	5		5	8
	1.4	5		4	4
	1.6	4		4	4
	1.8	6		6	8
	2	6		5	4
	2.2	5		5	5
	2.4	6		4	6
	2.6	4		4	5
	2.8	5		5	4
	3	4		5	5
	3.2	4		6	5
	3.4	4		3	4
	3.6	5		5	5
	3.8	4		5	6
	4	6		5	4
	4.2	5		6	6
	4.4	5		5	5
	4.6	5		4	5
	4.8	4		4	5
	5	6		6	4
	5.2	5		4	6
	5.4	4		5	6
	5.6	4		6	5
	5.8	7		6	6
	6	5		5	6
	6.2	4		5	4
	6.4	5		6	6
	6.6	5		5	7
	6.8	6		4	6
	7	4		4	5
	7.2	5		4	5
	7.4	5		4	5
	7.6	6		3	4
	7.8	5		6	5
	8	4		4	5
	8.2	4		5	5
	8.4	6		5	7
	8.6	5		5	5
	8.8	5		5	7
	9	5		7	5
	9.2	5		4	5
	9.4	8		4	6
	9.6	6		5	4
	9.8	4		5	5
	10	5		5	6
	10.2	8		5	6
	10.4	9		4	5
	10.6	12		6	5
	10.8	13		5	5
	11	21		6	6
	11.2	33		5	5
	11.4	43		7	5
	11.6	56		5	4
	11.8	87		7	5
	12	96		7	6
	12.2	116		6	6
	12.4	142		6	6
	12.6	160		6	6
	12.8	198		5	10
	13	237		8	12
	13.2	275		7	10
	13.4	322		8	8
	13.6	351		7	6
	13.8	373		8	13
	14	409		10	11
	14.2	472		11	13
	14.4	513		11	16
	14.6	547		15	15
	14.8	619		14	17
	15	649		14	23
	15.2	695		21	18
	15.4	724		18	18
	15.6	715		25	23
	15.8	833		16	26
	16	816		26	24
	16.2	843		33	27
	16.4	923		25	25
	16.6	953		37	31
	16.8	1000		32	32
	17	1046		30	29
	17.2	1097		35	39
	17.4	1128		33	41
	17.6	1131		47	41
	17.8	1200		41	44
	18	1152		38	42
	18.2	1242		48	52
	18.4	1277		55	68
	18.6	1249		49	53
	18.8	1289		60	53
	19	1382		54	60
	19.2	1365		61	62
	19.4	1383		60	54
	19.6	1393		68	70
	19.8	1420		71	65
	20	1450		60	70
	20.2	1450		67	85
	20.4	1492		70	76
	20.6	1500		74	77
	20.8	1542		75	94
	21	1538		71	70
	22.3	1214		570	513
	22.5	1189		527	487
	22.7	1142		490	457
	22.9	1154		470	448
	23.1	1105		496	435
	23.3	1124		433	445
	23.5	1118		448	456
	23.7	1082		438	431
	23.9	1098		433	443
	24.1	1044		428	446
	24.3	1091		432	453
	24.5	1086		425	445
	24.7	1074		431	465
	24.9	1066		451	443
	25.1	1022		439	475
	25.3	1072		444	466
	25.5	1029		435	473
	25.7	1107		430	463
	25.9	1039		456	462
	26.1	1079		455	489
	26.3	1055		441	466
	26.5	1053		486	489
	26.7	1073		462	483
	26.9	1087		478	474
	27.1	1073		472	500
	27.3	1080		483	485
	28.4667	1033		473	494
	28.6667	1025		491	456
	28.8667	1059		479	476
	29.0667	1039		486	508
	29.2667	1021		471	487
	29.4667	1030		490	497
	29.6667	1050		494	484
	29.8667	1017		497	516
	30.0667	1050		476	511
	30.2667	1026		483	508
	30.4667	1049		502	531
	30.6667	1054		445	522
	30.8667	1029		493	520
	31.0667	1030		487	527
	31.2667	1069		506	510
	31.4667	1083		511	526
	31.6667	1061		477	517
	31.8667	1013		495	547
	32.0667	1028		538	546
	32.2667	1040		520	507
	32.4667	1051		538	543
	32.6667	1089		541	545
	32.8667	1085		523	543
	33.0667	1097		553	559
	33.2667	1028		519	531
	33.4667	1072		541	577
	33.6667	1043		547	557
	33.8667	1080		537	545
	34.0667	1074		548	567
	34.2667	1010		557	574
	34.4667	1095		546	535
	34.6667	1086		562	580
	34.8667	1043		584	614
	35.0667	1064		529	595
	35.2667	1044		570	591
	35.4667	1061		547	586
	35.6667	1062		557	563
	35.8667	1079		558	571
	36.0667	1087		555	626
	36.2667	1050		594	591
	36.4667	1030		582	583
	36.6667	1061		573	614
	36.8667	1040		568	584
	37.0667	1033		589	590
	37.2667	1051		564	602
	37.4667	1058		602	618
	37.6667	1090		582	618
	37.8667	1100		581	637
	38.0667	1087		582	629
	38.2667	1097		585	614
	38.4667	1067		645	632
	38.6667	1056		596	621
	38.8667	1070		636	622
	39.0667	1016		630	613
	39.2667	1023		614	622
	39.4667	1067		617	636
	39.6667	1051		648	646
	39.8667	1054		626	656
	40.0667	1068		628	653
	40.2667	1083		627	644
	40.4667	1017		612	627
	40.6667	1052		608	630
	40.8667	1053		610	659
	41.0667	1047		634	659
	41.2667	1020		610	667
	41.4667	1059		633	644
	41.6667	1072		628	627
	41.8667	1046		631	672
	42.0667	1080		621	642
	42.2667	1063		601	682
	42.4667	1077		634	632
	42.6667	1041		643	692
	42.8667	1048		638	674
	43.0667	1079		638	712
	43.2667	1035		631	688
	43.4667	1055		618	708
	43.6667	978		663	666
	43.8667	1066		632	665
	44.0667	1054		613	678
	44.2667	1057		628	671
	44.4667	1035		639	694
	44.6667	1067		637	673
	44.8667	1073		621	647
	45.0667	1037		626	701
	45.2667	1072		657	680
	45.4667	1043		678	682
	45.6667	1022		682	668
	45.8667	1067		662	689
	46.0667	1062		666	730
	46.2667	1031		640	681
	46.4667	1078		620	670
	46.6667	1059		637	652
	46.8667	1065		643	717
	47.0667	1056		677	727
	47.2667	1022		639	716
	47.4667	1061		652	716
	47.6667	1041		659	720
	47.8667	1028		665	716
	48.0667	1089		670	696
	48.2667	1060		659	729
	48.4667	961		671	709
	48.6667	1083		695	751
	48.8667	1031		660	724
	49.0667	1044		658	726
	49.2667	1026		653	717
	49.4667	1009		690	694
	49.6667	998		660	716
	49.8667	1014		648	691
	50.0667	1055		695	684
	50.2667	1065		685	716
	50.4667	1057		651	701
	50.6667	1032		693	746
	50.8667	1052		673	728
	51.0667	1047		694	717
	51.2667	1026		675	743
	51.4667	1015		668	716
	51.6667	1025		664	749
	51.8667	1014		672	719
	52.0667	1072		673	744
	52.2667	1029		682	707
	52.4667	1055		678	716
	52.6667	1000		696	711
	52.8667	1011		686	713
	53.0667	1052		678	757
	53.2667	1050		664	743
	53.4667	1028		677	716
	53.6667	1004		684	705
	53.8667	1053		692	730
	54.0667	1002		709	728
	54.2667	1024		663	724
	54.4667	1038		670	740
	54.6667	1034		699	716
	54.8667	1024		668	745
	55.0667	1036		677	729
	55.2667	1056		674	695
	55.4667	1031		687	756
	55.6667	1017		661	737
	55.8667	1009		696	753
	56.0667	1046		706	765
	56.2667	1053		692	718
	56.4667	995		682	766
	56.6667	1028		669	744
	56.8667	1016		685	734
	57.0667	1020		679	726
	57.2667	1046		681	736
	57.4667	1020		696	764
	57.6667	1044		691	731
	57.8667	1004		670	749
	58.0667	1018		680	745
	58.2667	1016		691	790
	58.4667	1030		673	763
	58.6667	978		698	742
	58.8667	1007		695	741
	59.0667	1058		679	760
	59.2667	1015		694	753
	59.4667	1017		704	742
	59.6667	971		697	754
	59.8667	1017		742	749
	60.0667	1014		706	789
	60.2667	1013		683	719
	60.4667	1001		717	761
	60.6667	988		711	739
	60.8667	996		744	755
	61.0667	1001		727	742
	61.2667	1031		700	769
	61.4667	1016		715	752
	61.6667	1026		711	789
	61.8667	1026		718	780
	62.0667	966		676	759
	62.2667	1015		679	738
	62.4667	1019		668	740
	62.6667	1011		696	729
	62.8667	1005		706	742
	63.0667	993		729	757
	63.2667	985		727	746
	63.4667	1004		682	764
	63.6667	1015		706	771
	63.8667	982		668	773
	64.0667	968		705	758
	64.2667	987		758	728
	64.4667	976		710	787
	64.6667	1010		680	757
	64.8667	1009		726	749
	65.0667	986		701	792
	65.2667	977		697	802
	65.4667	1016		686	772
	65.6667	942		688	776
	65.8667	1014		724	766
	66.0667	967		693	747
	66.2667	964		705	752
	66.4667	972		714	759
	66.6667	985		688	779
	66.8667	975		714	755
	67.0667	999		673	771
	67.2667	977		726	763
	67.4667	939		713	751
	67.6667	987		730	777
	67.8667	1028		723	760
	68.0667	990		686	755
	68.2667	1012		728	795
	68.4667	998		712	766
	68.6667	974		708	742
	68.8667	980		706	778
	69.0667	979		676	785
	69.2667	1004		688	785
	69.4667	964		693	787
	69.6667	965		691	772
	69.8667	954		740	766
	70.0667	1019		753	781
	70.2667	911		720	799
	70.4667	976		708	748
	70.6667	966		705	781
	70.8667	985		740	759
	71.0667	988		689	775
	71.2667	992		718	746
	71.4667	947		727	768
	71.6667	1003		705	774
	71.8667	945		709	780
	72.0667	981		718	792
	72.2667	1003		680	768
	72.4667	969		681	777
	72.6667	943		714	790
	72.8667	1003		711	784
	73.0667	990		700	754
	73.2667	971		684	764
	73.4667	945		691	783
	73.6667	942		706	748
	73.8667	982		694	801
	74.0667	955		711	752
	74.2667	956		722	734
	74.4667	948		734	732
	74.6667	938		670	781
	74.8667	951		694	750
	75.0667	945		727	763
	75.2667	934		706	762
	75.4667	992		708	794
	75.6667	956		692	771
	75.8667	973		717	778
	76.0667	942		680	761
	76.2667	960		697	797
	76.4667	943		746	775
	76.6667	933		710	779
	76.8667	931		720	790
	77.0667	918		726	774
	77.2667	943		721	783
	77.4667	990		721	782
	77.6667	969		700	764
	77.8667	940		731	773
	78.0667	966		727	751
	78.2667	933		711	792
	78.4667	938		718	784
	78.6667	928		740	762
	78.8667	939		693	785
	79.0667	942		690	778
	79.2667	945		691	773
	79.4667	920		712	775
	79.6667	935		682	779
	79.8667	955		708	752
	80.0667	938		712	754
	80.2667	917		749	760
	80.4667	969		709	757
	80.6667	916		732	781
	80.8667	900		726	794
	81.0667	947		695	734
	81.2667	948		719	766
	81.4667	911		703	776
	81.6667	948		734	815
	81.8667	926		716	757
	82.0667	925		715	760
	82.2667	913		738	755
	82.4667	963		719	723
	82.6667	933		722	775
	82.8667	975		727	780
	83.0667	946		710	782
	83.2667	902		692	728
	83.4667	907		692	787
	83.6667	934		694	745
	83.8667	920		737	764
	84.0667	925		698	785
	84.2667	923		700	762
	84.4667	948		699	794
	84.6667	938		706	756
	84.8667	955		699	763
	85.0667	937		696	755
	85.2667	908		784	806
	85.4667	929		736	796
	85.6667	911		749	764
	85.8667	914		704	775
	86.0667	897		693	772
	86.2667	930		691	781
	86.4667	946		719	835
	86.6667	931		718	777
	86.8667	936		686	752
	87.0667	918		700	755
	87.2667	908		690	778
	87.4667	927		686	733
	87.6667	887		719	735
	87.8667	896		728	728
	88.0667	905		701	752
	88.2667	896		710	764
	88.4667	924		725	776

## Sheet: Fig 3B
Figure 3-source data 1		Note: Mean values plotted
Figure 3B	Time (min)	PM only (AU)*		EME + PM (AU)		Water only (AU)
	0	3	4	4	7	5	3		* the experiments in Figures 3A, 3B, and figure supplement 1B were done in the same batch, hence the data under "Truncated", "PM only" and "PM --> H2O" are the same
	0.2	5	5	4	7	5	5
	0.4	5	6	5	5	6	5
	0.6	5	5	6	6	5	7
	0.8	6	5	6	6	6	4
	1	4	5	5	5	5	6
	1.2	5	8	6	5	6	6
	1.4	4	4	4	5	5	5
	1.6	4	4	5	5	6	7
	1.8	6	8	6	4	4	5
	2	5	4	6	5	8	5
	2.2	5	5	5	7	4	5
	2.4	4	6	6	7	5	4
	2.6	4	5	7	5	5	4
	2.8	5	4	6	5	5	6
	3	5	5	6	8	6	5
	3.2	6	5	5	6	5	6
	3.4	3	4	6	4	5	5
	3.6	5	5	6	6	6	5
	3.8	5	6	4	5	5	4
	4	5	4	5	4	5	6
	4.2	6	6	4	5	4	5
	4.4	5	5	6	6	4	4
	4.6	4	5	5	3	6	5
	4.8	4	5	5	5	5	5
	5	6	4	5	7	6	5
	5.2	4	6	4	7	5	4
	5.4	5	6	4	5	4	8
	5.6	6	5	6	5	6	6
	5.8	6	6	6	3	4	6
	6	5	6	4	6	5	5
	6.2	5	4	4	5	6	4
	6.4	6	6	7	5	4	4
	6.6	5	7	5	7	7	6
	6.8	4	6	5	6	5	6
	7	4	5	5	4	4	5
	7.2	4	5	5	6	4	7
	7.4	4	5	5	5	5	5
	7.6	3	4	4	6	5	5
	7.8	6	5	6	6	4	9
	8	4	5	4	4	5	4
	8.2	5	5	5	5	5	6
	8.4	5	7	6	5	5	4
	8.6	5	5	4	5	5	5
	8.8	5	7	7	5	5	6
	9	7	5	5	4	6	6
	9.2	4	5	5	5	4	6
	9.4	4	6	5	6	5	5
	9.6	5	4	4	4	6	5
	9.8	5	5	5	5	3	6
	10	5	6	4	5	5	5
	10.2	5	6	5	4	4	5
	10.4	4	5	5	4	6	6
	10.6	6	5	5	5	7	6
	10.8	5	5	7	7	5	6
	11	6	6	4	5	6	5
	11.2	5	5	6	6	6	4
	11.4	7	5	7	4	7	5
	11.6	5	4	5	5	6	5
	11.8	7	5	5	4	4	7
	12	7	6	8	6	7	8
	12.2	6	6	5	6	8	5
	12.4	6	6	7	6	8	8
	12.6	6	6	6	7	9	10
	12.8	5	10	6	6	9	10
	13	8	12	9	9	11	11
	13.2	7	10	6	8	11	11
	13.4	8	8	7	10	8	9
	13.6	7	6	10	12	12	14
	13.8	8	13	12	9	18	11
	14	10	11	14	14	15	15
	14.2	11	13	11	17	14	15
	14.4	11	16	14	11	17	18
	14.6	15	15	11	20	21	21
	14.8	14	17	15	17	20	18
	15	14	23	14	19	18	22
	15.2	21	18	19	23	26	21
	15.4	18	18	22	21	28	25
	15.6	25	23	22	25	31	30
	15.8	16	26	27	27	34	34
	16	26	24	26	26	28	31
	16.2	33	27	26	27	37	37
	16.4	25	25	25	32	36	31
	16.6	37	31	29	33	37	38
	16.8	32	32	34	34	41	34
	17	30	29	29	44	38	42
	17.2	35	39	34	34	43	39
	17.4	33	41	42	40	46	47
	17.6	47	41	40	39	48	42
	17.8	41	44	38	52	55	51
	18	38	42	33	51	52	48
	18.2	48	52	50	59	53	55
	18.4	55	68	55	61	55	58
	18.6	49	53	52	58	64	55
	18.8	60	53	60	59	67	56
	19	54	60	53	59	66	53
	19.2	61	62	55	65	70	60
	19.4	60	54	62	64	73	65
	19.6	68	70	64	71	76	71
	19.8	71	65	62	66	66	80
	20	60	70	62	73	79	79
	20.2	67	85	68	83	79	76
	20.4	70	76	71	82	80	84
	20.6	74	77	75	82	86	79
	20.8	75	94	82	76	83	69
	21	71	70	77	82	91	83
	22.3	570	513	425	454	99	80
	22.5	527	487	421	435	97	99
	22.7	490	457	418	434	106	98
	22.9	470	448	400	399	107	97
	23.1	496	435	354	406	103	120
	23.3	433	445	368	377	114	97
	23.5	448	456	367	354	116	98
	23.7	438	431	350	361	106	111
	23.9	433	443	339	357	114	113
	24.1	428	446	323	338	131	108
	24.3	432	453	319	339	92	123
	24.5	425	445	330	378	122	110
	24.7	431	465	359	360	117	111
	24.9	451	443	338	368	125	127
	25.1	439	475	339	363	125	127
	25.3	444	466	379	403	122	136
	25.5	435	473	386	388	125	110
	25.7	430	463	383	371	120	129
	25.9	456	462	344	398	127	126
	26.1	455	489	374	395	130	122
	26.3	441	466	373	413	115	122
	26.5	486	489	403	414	131	129
	26.7	462	483	394	396	149	133
	26.9	478	474	421	410	156	137
	27.1	472	500	392	413	135	123
	27.3	483	485	414	447	137	134
	28.4667	473	494	412	434	149	145
	28.6667	491	456	451	456	162	150
	28.8667	479	476	418	458	141	129
	29.0667	486	508	441	429	163	136
	29.2667	471	487	400	446	151	142
	29.4667	490	497	444	461	164	134
	29.6667	494	484	452	467	158	148
	29.8667	497	516	465	482	147	145
	30.0667	476	511	453	496	159	149
	30.2667	483	508	455	497	164	146
	30.4667	502	531	437	495	169	141
	30.6667	445	522	471	490	166	150
	30.8667	493	520	472	515	163	152
	31.0667	487	527	474	473	169	158
	31.2667	506	510	485	513	180	163
	31.4667	511	526	508	532	177	170
	31.6667	477	517	502	526	185	168
	31.8667	495	547	490	527	148	155
	32.0667	538	546	514	548	181	164
	32.2667	520	507	509	542	195	171
	32.4667	538	543	497	523	177	164
	32.6667	541	545	522	572	174	160
	32.8667	523	543	556	552	181	179
	33.0667	553	559	527	570	189	160
	33.2667	519	531	518	561	188	160
	33.4667	541	577	505	586	183	162
	33.6667	547	557	551	567	193	175
	33.8667	537	545	568	583	184	180
	34.0667	548	567	550	566	193	181
	34.2667	557	574	588	577	190	186
	34.4667	546	535	547	590	194	173
	34.6667	562	580	567	576	212	175
	34.8667	584	614	581	613	189	177
	35.0667	529	595	590	588	221	199
	35.2667	570	591	566	611	201	181
	35.4667	547	586	571	592	198	178
	35.6667	557	563	593	596	212	196
	35.8667	558	571	565	604	208	190
	36.0667	555	626	618	663	213	207
	36.2667	594	591	601	602	191	198
	36.4667	582	583	613	611	209	193
	36.6667	573	614	634	615	210	206
	36.8667	568	584	590	648	229	199
	37.0667	589	590	620	644	218	201
	37.2667	564	602	614	662	225	207
	37.4667	602	618	628	661	208	231
	37.6667	582	618	638	671	214	220
	37.8667	581	637	626	677	244	197
	38.0667	582	629	659	693	215	226
	38.2667	585	614	616	678	213	211
	38.4667	645	632	639	689	230	223
	38.6667	596	621	627	654	230	221
	38.8667	636	622	636	680	229	204
	39.0667	630	613	637	735	227	229
	39.2667	614	622	647	692	234	226
	39.4667	617	636	639	702	231	231
	39.6667	648	646	657	693	237	232
	39.8667	626	656	674	715	262	246
	40.0667	628	653	672	691	248	244
	40.2667	627	644	640	711	243	239
	40.4667	612	627	703	725	241	228
	40.6667	608	630	700	734	271	217
	40.8667	610	659	678	720	250	228
	41.0667	634	659	679	706	243	257
	41.2667	610	667	702	748	261	256
	41.4667	633	644	688	724	275	243
	41.6667	628	627	705	745	251	236
	41.8667	631	672	711	780	260	258
	42.0667	621	642	711	780	256	256
	42.2667	601	682	701	735	258	253
	42.4667	634	632	697	747	261	252
	42.6667	643	692	709	753	280	260
	42.8667	638	674	701	743	271	240
	43.0667	638	712	678	778	263	262
	43.2667	631	688	700	796	269	257
	43.4667	618	708	740	787	292	258
	43.6667	663	666	698	768	263	264
	43.8667	632	665	735	766	258	276
	44.0667	613	678	743	775	294	260
	44.2667	628	671	707	783	277	284
	44.4667	639	694	703	762	290	252
	44.6667	637	673	724	779	294	275
	44.8667	621	647	702	766	290	282
	45.0667	626	701	738	772	280	295
	45.2667	657	680	734	790	298	263
	45.4667	678	682	763	816	292	281
	45.6667	682	668	748	817	304	279
	45.8667	662	689	750	766	305	298
	46.0667	666	730	752	800	315	302
	46.2667	640	681	718	816	289	291
	46.4667	620	670	727	793	297	286
	46.6667	637	652	751	849	327	274
	46.8667	643	717	715	796	310	283
	47.0667	677	727	713	801	313	308
	47.2667	639	716	780	821	327	301
	47.4667	652	716	706	795	301	303
	47.6667	659	720	721	794	303	284
	47.8667	665	716	732	806	305	307
	48.0667	670	696	723	840	316	306
	48.2667	659	729	749	832	328	302
	48.4667	671	709	703	780	314	310
	48.6667	695	751	752	792	310	322
	48.8667	660	724	732	804	323	303
	49.0667	658	726	729	807	335	315
	49.2667	653	717	734	818	343	313
	49.4667	690	694	748	807	332	296
	49.6667	660	716	736	821	345	305
	49.8667	648	691	727	838	316	313
	50.0667	695	684	739	807	331	318
	50.2667	685	716	739	838	312	306
	50.4667	651	701	779	845	353	317
	50.6667	693	746	737	845	351	323
	50.8667	673	728	742	848	336	302
	51.0667	694	717	724	826	348	313
	51.2667	675	743	745	835	348	320
	51.4667	668	716	734	793	330	327
	51.6667	664	749	719	865	330	370
	51.8667	672	719	770	782	333	329
	52.0667	673	744	730	827	355	339
	52.2667	682	707	730	821	343	337
	52.4667	678	716	750	839	363	323
	52.6667	696	711	736	841	346	348
	52.8667	686	713	748	863	363	367
	53.0667	678	757	716	849	356	349
	53.2667	664	743	736	830	351	365
	53.4667	677	716	758	837	373	321
	53.6667	684	705	740	825	384	342
	53.8667	692	730	749	841	352	353
	54.0667	709	728	757	810	378	356
	54.2667	663	724	769	820	367	375
	54.4667	670	740	744	837	386	352
	54.6667	699	716	738	827	374	351
	54.8667	668	745	770	851	365	382
	55.0667	677	729	737	855	374	334
	55.2667	674	695	747	862	385	361
	55.4667	687	756	765	846	398	368
	55.6667	661	737	755	856	401	359
	55.8667	696	753	759	828	367	360
	56.0667	706	765	715	823	384	369
	56.2667	692	718	779	847	405	385
	56.4667	682	766	772	822	385	369
	56.6667	669	744	780	824	368	370
	56.8667	685	734	767	858	397	375
	57.0667	679	726	755	841	416	368
	57.2667	681	736	751	853	414	387
	57.4667	696	764	766	840	395	368
	57.6667	691	731	789	841	413	414
	57.8667	670	749	758	836	402	392
	58.0667	680	745	784	815	389	394
	58.2667	691	790	736	866	402	395
	58.4667	673	763	761	852	431	359
	58.6667	698	742	755	849	385	400
	58.8667	695	741	739	870	399	380
	59.0667	679	760	757	850	400	366
	59.2667	694	753	778	841	410	379
	59.4667	704	742	775	855	389	381
	59.6667	697	754	758	799	418	402
	59.8667	742	749	750	842	427	400
	60.0667	706	789	755	841	425	397
	60.2667	683	719	748	843	405	410
	60.4667	717	761	743	856	411	405
	60.6667	711	739	744	845	409	379
	60.8667	744	755	777	840	436	405
	61.0667	727	742	739	835	428	426
	61.2667	700	769	757	860	425	406
	61.4667	715	752	723	849	432	392
	61.6667	711	789	729	825	434	411
	61.8667	718	780	727	863	412	427
	62.0667	676	759	730	847	447	403
	62.2667	679	738	737	842	416	417
	62.4667	668	740	756	812	409	401
	62.6667	696	729	758	808	447	398
	62.8667	706	742	728	845	425	438
	63.0667	729	757	759	847	447	431
	63.2667	727	746	770	856	457	435
	63.4667	682	764	750	847	457	438
	63.6667	706	771	739	832	464	419
	63.8667	668	773	772	839	441	427
	64.0667	705	758	763	827	463	427
	64.2667	758	728	764	838	450	422
	64.4667	710	787	781	860	448	432
	64.6667	680	757	776	849	470	430
	64.8667	726	749	767	839	458	427
	65.0667	701	792	737	800	472	420
	65.2667	697	802	728	840	462	428
	65.4667	686	772	751	852	485	453
	65.6667	688	776	724	834	466	447
	65.8667	724	766	728	855	461	438
	66.0667	693	747	751	798	479	439
	66.2667	705	752	759	834	502	437
	66.4667	714	759	788	819	460	468
	66.6667	688	779	748	836	452	429
	66.8667	714	755	713	809	473	450
	67.0667	673	771	748	806	471	427
	67.2667	726	763	751	872	485	463
	67.4667	713	751	760	864	468	436
	67.6667	730	777	764	864	494	476
	67.8667	723	760	759	873	472	455
	68.0667	686	755	769	817	473	470
	68.2667	728	795	759	855	476	462
	68.4667	712	766	734	876	479	458
	68.6667	708	742	745	875	482	471
	68.8667	706	778	765	826	506	457
	69.0667	676	785	759	856	487	459
	69.2667	688	785	789	835	482	453
	69.4667	693	787	756	848	510	479
	69.6667	691	772	778	809	503	463
	69.8667	740	766	749	865	506	477
	70.0667	753	781	755	830	499	489
	70.2667	720	799	735	879	495	477
	70.4667	708	748	723	883	504	460
	70.6667	705	781	760	831	499	485
	70.8667	740	759	792	832	493	492
	71.0667	689	775	749	878	499	491
	71.2667	718	746	758	845	507	482
	71.4667	727	768	756	859	528	481
	71.6667	705	774	735	860	539	483
	71.8667	709	780	736	828	504	481
	72.0667	718	792	795	866	486	502
	72.2667	680	768	726	813	533	474
	72.4667	681	777	749	848	536	496
	72.6667	714	790	770	825	502	505
	72.8667	711	784	757	855	513	488
	73.0667	700	754	781	844	522	495
	73.2667	684	764	759	837	536	486
	73.4667	691	783	753	868	516	517
	73.6667	706	748	763	873	528	497
	73.8667	694	801	743	814	533	511
	74.0667	711	752	707	850	524	476
	74.2667	722	734	723	857	544	525
	74.4667	734	732	767	877	524	488
	74.6667	670	781	741	863	540	495
	74.8667	694	750	774	866	532	554
	75.0667	727	763	794	865	537	492
	75.2667	706	762	760	848	547	494
	75.4667	708	794	790	833	527	536
	75.6667	692	771	787	845	539	512
	75.8667	717	778	729	837	550	521
	76.0667	680	761	747	855	564	540
	76.2667	697	797	750	884	545	512
	76.4667	746	775	779	834	536	523
	76.6667	710	779	781	831	553	551
	76.8667	720	790	738	805	543	530
	77.0667	726	774	752	848	544	542
	77.2667	721	783	718	860	559	494
	77.4667	721	782	741	863	553	539
	77.6667	700	764	743	862	563	547
	77.8667	731	773	754	875	561	535
	78.0667	727	751	734	857	572	527
	78.2667	711	792	742	837	563	515
	78.4667	718	784	749	857	549	511
	78.6667	740	762	730	851	580	558
	78.8667	693	785	733	826	584	517
	79.0667	690	778	760	866	582	516
	79.2667	691	773	758	836	592	548
	79.4667	712	775	756	845	575	560
	79.6667	682	779	757	861	559	532
	79.8667	708	752	736	827	563	543
	80.0667	712	754	756	829	564	559
	80.2667	749	760	730	833	598	541
	80.4667	709	757	745	856	575	543
	80.6667	732	781	750	811	571	546
	80.8667	726	794	775	877	581	543
	81.0667	695	734	734	850	577	533
	81.2667	719	766	736	833	588	576
	81.4667	703	776	740	835	594	567
	81.6667	734	815	742	820	581	556
	81.8667	716	757	756	849	562	553
	82.0667	715	760	746	828	577	573
	82.2667	738	755	736	873	621	540
	82.4667	719	723	740	823	578	571
	82.6667	722	775	749	834	600	543
	82.8667	727	780	739	808	626	572
	83.0667	710	782	781	862	602	573
	83.2667	692	728	741	852	617	579
	83.4667	692	787	739	840	575	585
	83.6667	694	745	752	888	605	555
	83.8667	737	764	748	870	571	596
	84.0667	698	785	704	869	612	599
	84.2667	700	762	750	836	629	562
	84.4667	699	794	788	840	620	579
	84.6667	706	756	762	837	590	570
	84.8667	699	763	728	817	608	601
	85.0667	696	755	722	830	591	602
	85.2667	784	806	744	848	588	595
	85.4667	736	796	728	825	614	572
	85.6667	749	764	736	840	589	581
	85.8667	704	775	761	816	580	577
	86.0667	693	772	724	831	611	588
	86.2667	691	781	757	843	643	595
	86.4667	719	835	757	820	612	617
	86.6667	718	777	757	834	622	603
	86.8667	686	752	734	851	635	579
	87.0667	700	755	757	843	637	611
	87.2667	690	778	693	828	591	614
	87.4667	686	733	736	872	620	597
	87.6667	719	735	719	833	648	626
	87.8667	728	728	757	833	636	617
	88.0667	701	752	742	813	646	593
	88.2667	710	764	738	827	643	619
	88.4667	725	776	765	863	658	617

## Sheet: Fig 3C
Figure 3-source data 1		Note: Mean values plotted
Figure 3C	Time (min)	GDPNP --> H2O --> PM (AU)		GDPNP --> EME --> PM (AU)		GDPNP --> ANS --> PM (AU)		GDPNP --> EME --> H2O (AU)
	0	5	4	4	7	7	7	6	5
	0.166667	5	7	7	5	6	8	6	9
	0.333333	6	5	8	7	4	8	7	6
	0.5	4	7	5	6	7	5	8	7
	0.666667	6	8	5	7	5	7	6	7
	0.833333	7	6	8	7	5	8	7	5
	1	5	6	8	6	5	6	6	6
	1.16667	8	5	6	5	5	7	8	7
	1.33333	7	7	6	5	6	5	7	7
	1.5	6	7	6	7	5	4	8	5
	1.66667	5	6	6	6	5	7	6	6
	1.83333	5	6	7	6	6	6	6	5
	2	5	6	6	6	6	4	7	7
	2.16667	7	6	5	7	6	7	6	5
	2.33333	8	4	5	6	7	8	5	7
	2.5	5	8	7	5	5	6	5	6
	2.66667	6	6	5	7	5	5	8	5
	2.83333	6	6	6	6	5	5	7	6
	3	5	7	7	7	7	6	6	18
	3.16667	6	7	7	5	6	6	5	7
	3.33333	6	6	6	6	5	5	5	6
	3.5	6	7	7	7	7	7	6	6
	3.66667	5	7	6	5	6	5	7	7
	3.83333	7	6	6	6	7	7	6	6
	4	6	5	6	5	7	5	6	5
	4.16667	5	5	7	7	6	7	5	6
	4.33333	6	7	9	6	6	5	6	6
	4.5	7	6	6	7	5	6	8	7
	4.66667	6	4	5	6	7	5	6	7
	4.83333	7	7	7	9	7	5	5	6
	5	6	6	5	8	7	6	5	4
	5.16667	6	7	7	5	7	6	5	8
	5.33333	5	7	6	7	5	6	7	5
	5.5	34	6	7	5	6	7	8	5
	5.66667	6	6	5	8	5	8	6	6
	5.83333	8	5	6	7	6	6	6	7
	6	7	6	6	6	6	6	6	4
	6.16667	6	7	6	7	7	5	6	5
	6.33333	5	6	7	5	5	6	6	7
	6.5	6	6	5	7	5	6	8	6
	6.66667	5	5	6	7	6	7	6	6
	6.83333	6	6	6	6	9	5	5	6
	7	6	7	5	5	5	5	7	6
	7.16667	5	5	7	5	6	6	6	5
	7.33333	6	5	6	6	7	5	5	5
	7.5	5	6	6	7	5	5	6	6
	7.66667	6	5	7	6	5	6	6	6
	7.83333	6	5	6	5	6	7	7	6
	8	5	8	5	6	6	5	5	6
	8.16667	7	5	6	7	8	5	5	6
	8.33333	6	7	7	5	6	6	5	6
	8.5	5	7	5	6	7	6	6	5
	8.66667	6	7	7	6	6	6	5	7
	8.83333	5	6	7	6	7	5	8	5
	9	6	6	6	5	5	6	6	5
	9.16667	5	6	6	6	5	6	8	6
	9.33333	6	5	5	6	5	6	6	6
	9.5	6	6	6	7	7	7	6	6
	9.66667	5	5	5	6	8	6	7	8
	9.83333	6	6	6	5	5	6	5	6
	10	6	7	5	5	6	5	7	6
	10.1667	7	6	8	5	7	6	6	6
	10.3333	6	7	7	6	7	5	6	5
	10.5	5	6	6	6	6	7	7	6
	10.6667	6	6	6	7	6	6	7	6
	10.8333	6	7	7	7	8	7	7	5
	11	6	7	8	5	7	6	7	6
	11.1667	7	6	8	8	9	5	6	7
	11.3333	6	7	6	6	9	6	8	6
	11.5	6	6	9	5	9	6	9	7
	11.6667	7	7	7	6	13	6	8	5
	11.8333	7	7	10	7	12	4	7	6
	12	9	5	9	6	9	7	9	7
	12.1667	9	5	11	7	15	8	10	7
	12.3333	10	7	11	7	9	6	11	7
	12.5	10	9	14	9	13	7	15	5
	12.6667	13	8	8	8	18	8	12	7
	12.8333	10	7	11	8	19	5	15	7
	13	12	7	15	12	18	7	14	8
	13.1667	10	8	12	9	19	8	16	8
	13.3333	18	8	20	8	19	8	16	9
	13.5	15	7	15	9	20	10	19	9
	13.6667	11	8	18	10	18	9	20	10
	13.8333	15	7	22	12	23	11	21	9
	14	17	12	20	12	26	9	17	11
	14.1667	19	10	20	12	29	14	14	16
	14.3333	24	11	21	16	34	10	22	12
	14.5	22	16	24	12	28	11	20	14
	14.6667	20	13	28	17	32	15	25	15
	14.8333	23	12	25	18	32	13	27	17
	15	30	19	27	20	35	17	33	16
	15.1667	26	18	26	16	34	13	31	18
	15.3333	27	17	31	19	43	16	32	20
	15.5	25	15	37	24	45	17	28	18
	15.6667	28	20	31	23	45	15	34	15
	15.8333	25	17	35	19	46	21	31	23
	16	32	17	41	27	51	22	45	23
	18.9833	36	36	35	42	52	42	50	45
	19.15	41	26	42	44	60	28	41	30
	19.3167	36	28	45	36	68	39	49	35
	19.4833	41	38	47	38	54	36	41	37
	19.65	43	28	44	37	66	33	43	36
	19.8167	37	39	42	36	59	36	42	34
	19.9833	39	36	37	41	56	28	32	35
	20.15	38	33	39	48	62	36	48	31
	20.3167	36	33	39	37	60	40	57	37
	20.4833	44	32	42	28	64	39	43	44
	20.65	43	27	47	34	57	34	42	34
	20.8167	40	34	42	34	66	38	49	32
	20.9833	40	35	42	39	57	37	47	35
	21.15	39	41	41	34	59	31	48	33
	21.3167	51	31	52	45	70	34	40	45
	21.4833	43	34	48	45	62	39	42	33
	21.65	42	37	46	41	69	37	43	41
	21.8167	41	29	50	48	63	42	44	34
	21.9833	39	37	46	39	67	37	52	45
	22.15	42	39	43	43	60	35	56	38
	22.3167	43	43	47	40	70	42	41	42
	22.4833	43	29	47	41	61	31	55	37
	22.65	38	33	51	45	75	47	50	39
	22.8167	44	37	48	44	69	34	54	36
	22.9833	37	37	59	49	72	37	53	44
	23.15	49	44	43	45	77	39	50	38
	23.3167	42	30	63	42	68	40	42	32
	23.4833	50	36	48	41	76	41	53	39
	23.65	43	41	47	47	76	44	57	41
	23.8167	46	39	45	48	69	39	52	46
	23.9833	53	49	51	51	76	35	52	51
	25.9167	46	53	59	63	83	48	57	54
	26.0833	49	40	61	66	59	44	57	49
	26.25	51	45	68	54	83	48	62	46
	26.4167	53	42	53	45	72	39	63	45
	26.5833	50	47	67	58	72	45	57	45
	26.75	49	47	59	46	71	49	58	47
	26.9167	53	49	57	59	73	41	62	50
	27.0833	54	40	61	58	70	46	61	42
	27.25	48	44	59	46	75	40	57	47
	27.4167	61	41	62	46	71	41	66	51
	27.5833	49	45	63	61	79	45	65	48
	27.75	54	42	50	62	64	49	63	50
	27.9167	62	49	57	55	60	42	61	53
	28.0833	55	53	64	66	67	57	66	60
	28.25	53	53	63	70	73	47	74	55
	28.4167	52	41	61	60	73	40	59	50
	28.5833	52	48	50	54	71	53	59	55
	28.75	55	52	60	55	80	47	68	46
	28.9167	58	49	73	56	88	50	64	54
	29.0833	66	49	64	67	66	51	60	54
	29.25	54	57	60	60	71	46	61	54
	29.4167	54	53	69	63	72	44	75	54
	29.5833	55	49	61	66	71	55	62	58
	29.75	66	47	70	61	74	44	61	53
	29.9167	61	54	73	65	73	56	76	49
	30.0833	53	53	81	60	78	63	73	58
	30.25	62	45	75	68	79	46	82	52
	30.4167	69	40	61	67	70	53	74	58
	30.5833	56	41	63	61	80	48	80	48
	30.75	56	46	76	63	81	53	79	55
	30.9167	56	62	66	64	77	58	73	51
	32.25	255	264	276	281	121	76	79	61
	32.4167	277	239	273	295	132	79	66	59
	32.5833	242	267	272	268	121	91	73	58
	32.75	261	264	274	268	129	98	71	65
	32.9167	255	265	262	276	134	88	75	64
	33.0833	255	251	258	273	123	92	75	58
	33.25	260	244	275	276	134	91	62	75
	33.4167	250	260	262	271	136	98	71	69
	33.5833	261	256	268	246	134	100	68	74
	33.75	245	234	267	265	138	90	71	62
	33.9167	265	243	280	284	134	103	77	58
	34.0833	269	238	285	275	132	101	74	62
	34.25	264	251	297	278	139	98	68	66
	34.4167	249	252	267	282	144	97	88	65
	34.5833	245	233	290	273	127	94	64	60
	34.75	254	240	276	286	143	100	78	66
	34.9167	284	251	299	297	137	97	85	63
	35.0833	258	257	287	287	147	114	70	70
	35.25	282	248	297	292	142	98	87	65
	35.4167	278	255	296	276	147	112	82	64
	35.5833	272	242	290	279	144	109	74	68
	35.75	286	242	296	286	146	113	80	64
	35.9167	256	245	313	286	144	105	87	70
	36.0833	292	260	308	302	166	105	88	52
	36.25	290	252	305	319	168	110	77	71
	36.4167	289	263	317	313	154	107	89	70
	36.5833	299	268	307	318	161	113	92	77
	36.75	306	282	327	282	148	109	79	66
	36.9167	309	265	316	295	167	109	80	67
	37.0833	310	260	299	303	158	109	77	62
	37.25	313	278	328	295	160	126	77	74
	37.4167	314	286	320	309	163	130	78	73
	37.5833	323	274	311	314	142	130	77	61
	37.75	315	301	350	329	176	118	84	81
	37.9167	341	281	340	342	169	123	92	64
	38.0833	304	289	348	330	167	124	85	81
	38.25	341	312	351	325	178	120	92	56
	38.4167	324	289	351	343	175	115	86	73
	38.5833	351	296	344	336	174	115	87	82
	38.75	345	314	353	341	175	117	84	61
	38.9167	345	307	358	350	170	127	87	68
	39.0833	366	296	369	345	168	113	89	72
	39.25	342	307	372	345	173	123	87	75
	39.4167	349	310	386	375	162	127	90	76
	39.5833	349	286	372	348	170	120	86	90
	39.75	361	313	372	358	186	130	90	72
	39.9167	346	311	363	350	169	137	88	74
	40.0833	357	326	379	372	181	122	96	77
	40.25	362	342	374	379	186	148	84	81
	40.4167	348	325	402	384	184	141	99	72
	40.5833	348	334	393	367	193	141	93	71
	40.75	392	337	401	378	173	129	92	84
	40.9167	366	346	360	379	176	125	82	80
	41.0833	365	332	399	384	178	142	92	77
	41.25	390	335	404	408	192	136	92	80
	41.4167	393	349	412	390	192	141	84	75
	41.5833	398	330	408	409	205	122	87	89
	41.75	400	352	428	406	201	144	94	80
	41.9167	407	356	395	406	207	131	92	89
	42.0833	391	362	416	395	194	137	91	83
	42.25	404	345	420	428	189	140	97	81
	42.4167	390	369	413	416	190	151	95	87
	42.5833	414	361	433	363	206	150	100	82
	42.75	464	347	429	422	203	150	102	91
	42.9167	412	367	441	424	205	153	109	87
	43.0833	428	375	431	408	212	147	103	93
	43.25	406	381	422	445	201	149	106	85
	43.4167	411	332	427	435	207	148	88	83
	43.5833	416	393	450	414	208	155	110	80
	43.75	403	359	452	393	227	156	95	92
	43.9167	439	394	436	411	202	156	102	99
	44.0833	435	357	443	404	196	163	100	87
	44.25	412	387	445	455	212	152	115	82
	44.4167	402	385	443	450	215	145	108	93
	44.5833	431	370	442	445	209	161	98	85
	44.75	443	380	465	464	229	164	104	91
	44.9167	455	392	438	449	207	138	105	93
	45.0833	442	394	444	441	222	141	101	89
	45.25	458	406	470	458	221	164	100	97
	45.4167	435	416	454	463	238	149	95	97
	45.5833	444	384	481	449	225	159	113	104
	45.75	468	395	451	430	226	172	101	104
	45.9167	458	397	468	471	235	158	99	101
	46.0833	446	388	490	468	221	161	111	78
	46.25	455	396	460	453	228	163	97	82
	46.4167	450	398	449	496	223	178	111	101
	46.5833	464	395	503	471	229	159	107	95
	46.75	475	409	519	480	217	162	115	107
	46.9167	450	421	484	481	222	166	122	93
	47.0833	458	424	472	490	230	171	116	103
	47.25	485	405	491	473	226	168	113	105
	47.4167	452	394	493	491	240	175	103	93
	47.5833	499	406	503	473	235	174	105	93
	47.75	479	412	509	486	244	188	117	105
	47.9167	478	418	510	472	235	169	109	97
	48.0833	487	445	489	484	236	171	110	93
	48.25	483	396	494	486	231	179	116	103
	48.4167	490	446	468	475	236	180	110	109
	48.5833	487	428	485	466	248	177	126	99
	48.75	498	429	500	500	234	181	117	100
	48.9167	486	438	499	488	237	172	110	102
	49.0833	493	437	508	487	242	184	130	111
	49.25	490	434	515	501	247	189	120	118
	49.4167	484	407	507	511	231	193	136	96
	49.5833	492	424	506	542	250	172	124	104
	49.75	496	450	493	492	256	189	134	108
	49.9167	516	425	507	488	246	175	131	96
	50.0833	508	426	496	489	242	171	120	102
	50.25	508	425	495	466	251	193	128	108
	50.4167	511	426	547	482	261	184	135	107
	50.5833	545	428	515	495	253	184	118	112
	50.75	511	436	508	504	257	196	107	106
	50.9167	488	422	545	517	260	173	126	110
	51.0833	529	416	517	510	250	200	119	99
	51.25	485	437	521	507	261	201	118	110
	51.4167	518	416	528	506	257	208	123	107
	51.5833	501	439	485	503	231	186	127	111
	51.75	531	427	545	493	273	205	141	103
	51.9167	498	444	550	519	268	202	112	97
	52.0833	482	447	525	488	260	199	124	113
	52.25	557	446	550	509	259	215	140	106
	52.4167	521	465	516	488	267	211	126	99
	52.5833	500	452	513	521	236	190	132	108
	52.75	516	436	528	477	280	194	135	111
	52.9167	537	429	494	487	264	190	122	114
	53.0833	550	438	542	510	265	202	144	107
	53.25	517	479	540	542	244	205	142	109
	53.4167	524	450	524	510	261	200	128	117
	53.5833	539	466	512	519	292	206	135	111
	53.75	512	442	503	519	286	178	126	114
	53.9167	533	429	552	520	281	204	138	112
	54.0833	508	435	540	526	278	213	135	115
	54.25	538	451	517	524	256	188	142	119
	54.4167	520	445	549	528	298	214	138	127
	54.5833	504	445	521	491	249	212	143	115
	54.75	531	465	518	506	273	199	135	123
	54.9167	541	457	555	519	282	221	139	109
	55.0833	493	438	523	532	284	222	141	115
	55.25	526	426	508	498	293	218	148	117
	55.4167	523	448	552	503	272	222	137	130
	55.5833	512	445	548	532	280	195	138	128
	55.75	567	461	526	526	275	225	136	109
	55.9167	521	451	546	496	283	208	147	134
	56.0833	562	409	565	514	273	201	148	118
	56.25	546	492	522	497	294	228	141	127
	56.4167	526	429	517	524	281	230	136	111
	56.5833	518	431	529	504	275	221	151	115
	56.75	535	436	531	539	280	210	156	117
	56.9167	527	451	548	515	300	229	146	117
	57.0833	534	448	513	504	274	233	160	122
	57.25	503	435	523	494	297	225	147	117
	57.4167	529	457	550	518	304	200	152	118
	57.5833	504	435	531	531	297	208	141	142
	57.75	542	444	525	528	304	216	148	126
	57.9167	516	434	565	508	306	233	150	131
	58.0833	522	453	530	515	298	234	137	138
	58.25	526	418	528	513	298	221	146	130
	58.4167	536	453	522	514	304	223	142	135
	58.5833	509	448	541	519	303	218	140	134
	58.75	540	458	553	518	288	209	141	132
	58.9167	534	449	545	521	288	227	143	126
	59.0833	543	435	523	526	293	230	151	148
	59.25	511	445	558	510	298	239	163	139
	59.4167	530	433	536	514	324	247	152	130
	59.5833	535	439	550	501	294	205	143	129
	59.75	525	441	576	516	318	233	154	133
	59.9167	517	459	563	521	302	244	164	133
	60.0833	516	416	529	516	313	243	160	130
	60.25	496	447	541	531	299	252	149	130
	60.4167	512	417	526	526	293	256	158	132
	60.5833	531	443	550	512	300	216	158	138
	60.75	534	433	567	524	295	236	153	125
	60.9167	524	460	515	530	302	247	160	134
	61.0833	535	466	568	515	298	236	159	128
	61.25	523	465	529	539	315	223	157	144
	61.4167	539	445	512	493	320	244	155	127
	61.5833	498	446	538	513	322	234	175	130
	61.75	534	442	544	508	318	255	166	143
	61.9167	518	449	560	518	291	249	159	136
	62.0833	534	471	537	511	319	244	165	130
	62.25	532	439	563	503	318	229	175	155
	62.4167	538	455	523	528	328	262	144	143
	62.5833	546	446	552	511	347	237	155	146
	62.75	506	439	533	510	307	246	152	145
	62.9167	503	443	563	518	333	242	164	149
	63.0833	537	462	563	513	298	247	160	142
	63.25	526	463	547	539	307	257	162	157
	63.4167	543	469	558	550	329	232	159	146
	63.5833	524	430	553	514	313	258	178	143
	63.75	523	433	572	536	314	253	162	152
	63.9167	528	447	537	541	326	225	162	147
	64.0833	510	451	528	562	320	264	182	153
	64.25	548	471	557	564	348	263	156	145
	64.4167	506	452	557	508	312	259	167	135
	64.5833	546	447	562	538	321	251	153	145
	64.75	553	460	534	558	325	263	168	143
	64.9167	503	449	562	527	305	253	162	148
	65.0833	503	422	579	540	317	264	178	139
	65.25	515	462	529	520	329	250	182	151
	65.4167	511	444	552	520	332	269	176	147
	65.5833	515	452	551	519	338	247	179	134
	65.75	522	461	549	502	327	258	172	163
	65.9167	536	449	577	536	341	266	173	136
	66.0833	527	447	550	512	324	258	161	158
	66.25	522	449	548	539	320	259	170	155
	66.4167	531	436	556	546	320	261	171	166
	66.5833	522	444	529	519	333	258	179	139
	66.75	537	422	548	521	330	278	151	160
	66.9167	501	451	543	534	329	286	160	149
	67.0833	531	434	554	556	334	256	182	157
	67.25	535	462	566	537	342	251	189	147
	67.4167	528	437	560	516	344	245	170	152
	67.5833	536	446	549	550	348	263	172	141
	67.75	537	431	566	552	346	247	176	160
	67.9167	523	444	559	530	325	259	167	155
	68.0833	540	444	554	540	354	260	181	156
	68.25	531	465	541	524	338	262	199	158
	68.4167	556	463	548	520	315	264	187	158
	68.5833	485	424	566	562	358	280	178	151
	68.75	505	447	550	544	335	271	188	139
	68.9167	523	472	569	564	325	262	185	166
	69.0833	520	446	564	544	338	268	187	154
	69.25	502	444	547	537	343	258	174	158
	69.4167	517	461	562	526	333	260	176	155
	69.5833	483	457	547	529	338	265	182	164
	69.75	520	455	560	540	347	274	186	161
	69.9167	540	444	552	522	345	274	178	168
	70.0833	490	441	531	530	349	280	188	156
	70.25	519	477	565	536	346	283	195	175
	70.4167	503	449	571	543	354	286	203	169
	70.5833	524	425	520	541	334	264	179	179
	70.75	551	463	532	535	369	272	186	157
	70.9167	501	480	549	518	367	250	177	160
	71.0833	484	446	582	553	354	268	187	174
	71.25	509	460	574	555	345	283	184	170
	71.4167	535	444	578	521	371	274	172	171
	71.5833	549	446	553	537	383	284	185	166
	71.75	527	422	567	511	360	286	188	166
	71.9167	533	450	546	526	356	266	190	167
	72.0833	523	436	548	523	361	265	187	163
	72.25	527	460	531	562	351	283	188	181
	72.4167	501	448	567	535	334	278	183	167
	72.5833	523	425	527	520	352	283	211	174
	72.75	517	451	584	552	365	279	197	161
	72.9167	508	458	536	525	360	270	205	164
	73.0833	517	448	552	524	362	280	192	160
	73.25	524	452	539	571	345	277	177	171
	73.4167	515	464	536	533	365	278	193	164
	73.5833	541	462	540	523	360	286	177	164
	73.75	525	427	560	538	364	264	207	163
	73.9167	500	449	560	547	349	282	184	170
	74.0833	517	451	570	531	376	287	184	165
	74.25	519	429	550	534	356	281	198	172
	74.4167	504	436	547	543	374	308	203	166
	74.5833	521	456	563	558	365	285	199	174
	74.75	497	441	542	533	377	271	196	182
	74.9167	542	457	574	532	379	280	201	167
	75.0833	515	464	559	564	348	286	199	186
	75.25	530	424	549	535	341	272	211	173
	75.4167	504	415	555	527	380	304	204	191
	75.5833	501	464	562	532	371	307	203	185
	75.75	530	456	551	558	365	300	180	182
	75.9167	489	453	563	561	387	277	201	182
	76.0833	484	427	544	544	377	289	213	180
	76.25	526	434	533	541	358	297	195	189
	76.4167	523	421	544	530	391	282	184	186
	76.5833	502	429	564	554	364	288	200	167
	76.75	493	462	550	551	373	283	187	175
	76.9167	509	451	542	557	352	305	208	180
	77.0833	524	460	564	532	383	314	219	185
	77.25	526	453	548	525	357	278	213	178
	77.4167	502	436	589	547	349	295	188	183
	77.5833	528	453	554	515	389	278	196	188
	77.75	530	459	512	539	375	302	210	197
	77.9167	503	476	551	522	378	281	202	184
	78.0833	506	437	566	507	379	314	203	189
	78.25	514	454	544	517	390	300	230	192
	78.4167	515	437	569	545	403	297	205	174
	78.5833	491	442	568	550	361	283	213	192
	78.75	515	438	559	548	368	289	222	193
	78.9167	525	434	564	552	371	298	199	198
	79.0833	528	438	570	539	403	317	200	192
	79.25	526	447	574	519	385	294	199	175
	79.4167	508	452	548	556	370	282	215	187
	79.5833	523	451	566	510	388	310	206	178
	79.75	493	435	536	516	372	303	210	193
	79.9167	493	466	545	534	387	303	219	188
	80.0833	487	444	563	539	407	275	197	178
	80.25	500	451	554	524	395	300	218	198
	80.4167	495	450	540	557	392	274	223	174
	80.5833	511	448	558	525	388	301	201	193
	80.75	519	431	596	564	381	282	203	192
	80.9167	501	439	547	542	378	304	222	191
	81.0833	496	451	543	558	381	295	224	206
	81.25	503	448	533	534	381	297	226	207
	81.4167	494	452	528	549	382	309	225	187
	81.5833	499	457	552	559	393	325	201	179
	81.75	519	434	564	511	386	289	204	196
	81.9167	518	442	546	550	405	318	229	200
	82.0833	500	450	560	566	367	306	214	208
	82.25	512	449	550	555	382	309	206	204
	82.4167	505	451	565	537	376	309	204	188
	82.5833	513	461	596	528	407	307	235	196
	82.75	500	454	553	511	395	316	216	201
	82.9167	512	441	547	512	391	299	219	195
	83.0833	523	451	536	543	397	292	228	204
	83.25	524	426	551	550	399	342	225	205
	83.4167	517	420	572	554	381	316	223	208
	83.5833	530	438	518	547	413	304	218	193
	83.75	496	437	579	533	390	301	215	217
	83.9167	505	441	573	537	382	319	222	210
	84.0833	493	461	550	533	391	291	230	199
	84.25	521	466	553	546	399	299	226	186
	84.4167	487	440	531	538	406	321	239	206
	84.5833	512	439	552	538	399	323	232	186
	84.75	479	433	561	528	388	303	222	213
	84.9167	490	458	550	557	396	329	217	212
	85.0833	488	456	541	533	394	316	230	195
	85.25	502	442	550	537	407	301	225	214
	85.4167	496	452	546	550	393	314	229	200
	85.5833	516	468	543	525	404	301	225	204
	85.75	507	438	550	554	396	312	234	206
	85.9167	490	466	525	551	421	303	225	223
	86.0833	491	451	537	521	410	322	231	205
	86.25	505	430	570	532	383	314	241	197
	86.4167	489	442	563	556	430	314	231	196
	86.5833	502	427	533	534	404	319	222	198
	86.75	493	472	565	529	410	313	223	196
	86.9167	488	428	554	540	398	306	218	201
	87.0833	490	457	537	552	412	312	226	202
	87.25	496	431	557	525	404	309	221	206
	87.4167	472	426	561	537	397	324	232	195
	87.5833	487	444	528	536	437	322	237	209
	87.75	469	434	541	518	414	316	226	217
	87.9167	492	447	553	540	392	310	220	203
	88.0833	511	429	561	548	406	330	245	203
	88.25	483	437	552	541	405	319	226	208
	88.4167	474	433	571	515	389	301	233	209
	88.5833	483	439	570	506	434	304	239	209
	88.75	485	447	557	517	394	323	223	206
	88.9167	516	455	510	511	425	288	236	216
	89.0833	486	451	564	514	409	317	246	221
	89.25	501	472	544	528	404	316	227	215
	89.4167	517	432	553	537	425	307	257	189
	89.5833	496	448	573	554	399	305	241	189
	89.75	498	425	555	533	424	310	254	216
	89.9167	498	424	550	520	420	325	241	217
	90.0833	504	457	553	523	405	331	261	223
	90.25	508	450	554	532	414	331	235	229
	90.4167	491	448	570	536	414	324	244	228
	90.5833	489	435	541	524	429	359	236	202
	90.75	482	450	538	534	412	328	254	248
	90.9167	511	441	545	537	401	322	251	222
	91.0833	507	446	566	539	431	333	258	202
	91.25	503	438	539	532	395	322	227	229
	91.4167	499	443	529	530	417	315	248	219
	91.5833	499	424	537	500	409	342	250	204
	91.75	470	443	533	508	403	338	240	224
	91.9167	501	436	554	509	417	336	251	200
	92.0833	495	442	544	543	406	349	249	210
	92.25	506	429	551	520	416	329	249	240
