# Supplementary material for: Puromycin reactivity does not accurately localize translation at the subcellular level
Source: eLife. 2020 Aug 26;9:e60303. doi: 10.7554/eLife.60303 (PMC7490009; doi:10.7554/eLife.60303)
Supplement: Figure 4—source data 1. [file elife-60303-fig4-data1.xlsx]

## Sheet: Sheet1
Figure 4-source data 1		Fraction of mRNAs translating (each data point is one cell)
Figure 4C	Untreated	PM	EME/PM	ANS/PM
	0.7	0.0833	0.12	0.5556
	0.7273	0	0.0833	0.125
	0.7647	0	0.05	0.625
	0.5	0.2222	0.0345	0.4211
	0.2857	0.0556	0	0
	0.7647	0	0	0
	0.25	0.04	0	1
	0.8333	0	0	0.5
	0.6667	0.0667	0.1429	0.8333
	0.75	0.0714	0.125	0.3333
	0.2286	0	0	0.625
	0.6364	0	0.2273	0.0588
	0.1786	0	0	0.5417
	0.7	0	0.1379	0.7333
	0.6571	0	0.0833	0.619
	0.75	0.0588	0	0.4815
	1	0	0.1429	0.6957
	0.875	0	0	0.5
	0.6154	0	0	0.5
	0.7222	0.0385	0	0.8235
		0	0
		0	0
			0
			0.0526
			0
			0
			0.1818
