# Supplementary figures and images for: Puromycin reactivity does not accurately localize translation at the subcellular level
Source: eLife journal article supplement (doi:10.7554/elife.60303), 2020-08-26

Figure 3 - figure supplement 1

A

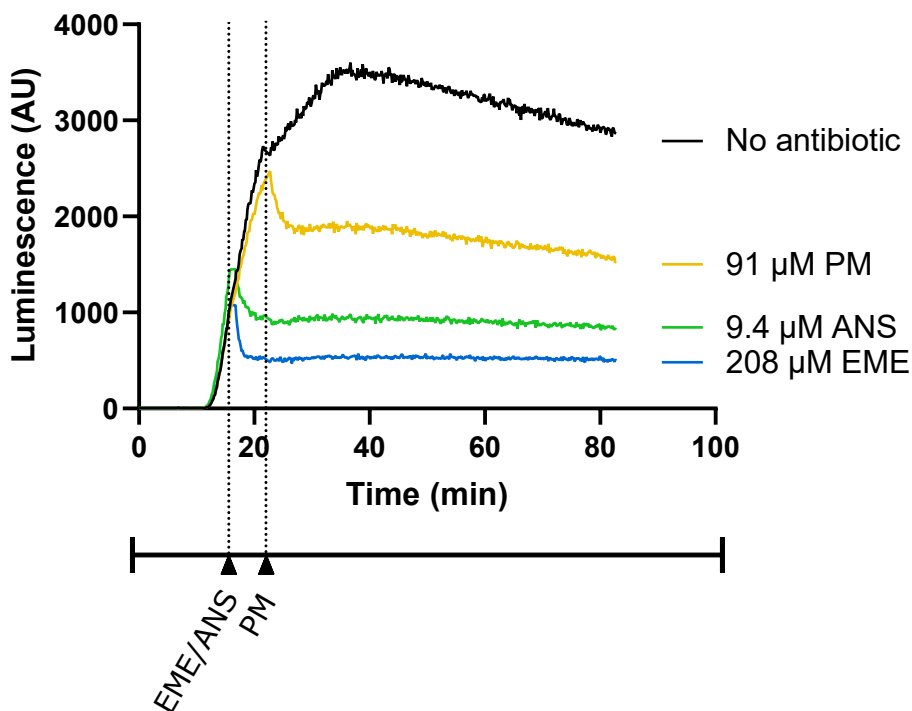

B

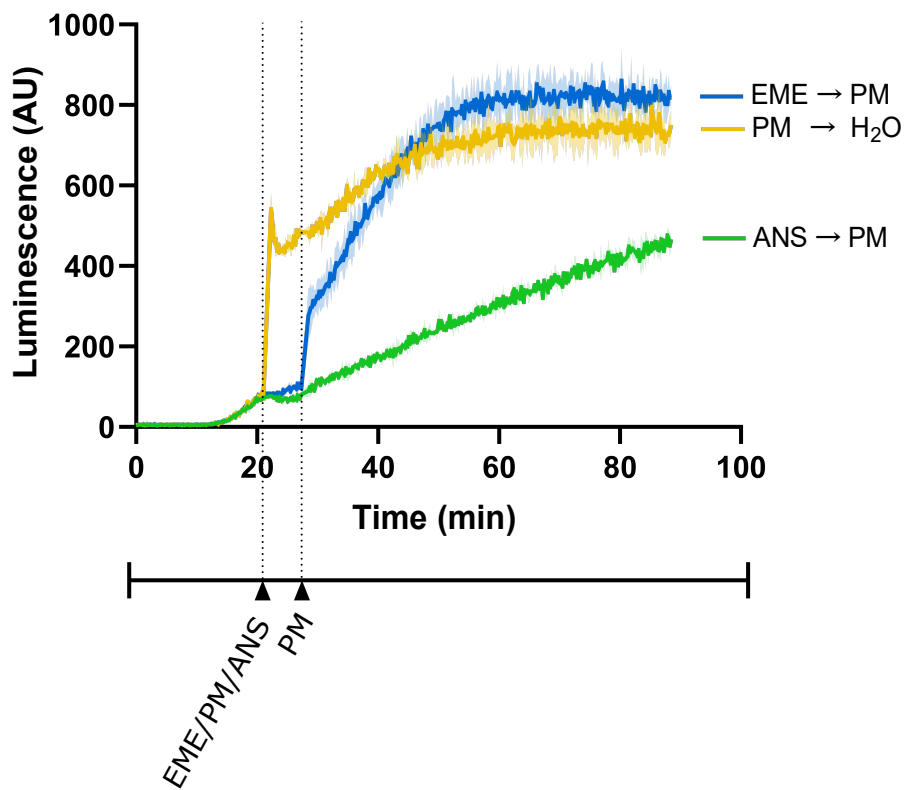

Supplement: supp [file elife_poa_e60303_Figure_3_figure_supplement_1.pdf › elife_poa_e60303_Figure_3_figure_supplement_1.pdf]
